# Supplementary material for: Mortality and Morbidity Among Individuals With Hypertension Receiving a Diuretic, ACE Inhibitor, or Calcium Channel Blocker: A Secondary Analysis of a Randomized Clinical Trial
Source: PubMed Central journal article supplement (PMC10696481; doi:10.1001/jamanetworkopen.2023.44998), 2023-12-04
Supplement: jamanetwopen-e2344998-s002.pdf [file jamanetwopen-e2344998-s002.pdf]

## Supplementary Online Content

Yamal JM, Martinez J, Osani MC, Du XL, Simpson LM, Davis BR. Mortality and morbidity among individuals with hypertension receiving a diuretic, ACE inhibitor, or calcium channel blocker: a secondary analysis of a randomized clinical trial. *JAMA Netw Open*. 2023;6(12):e2344998. doi:10.1001/jamanetworkopen.2023.44998

**eTable 1.** Baseline Characteristics for the Full Sample and by Randomized Group for Morbidity Study at the Time of Randomization

**eTable 2.** Adjusted Hazard Ratios for All-Cause and CVD Mortality With Follow-Up From 2/23/1994 to 12/31/2017

**eTable 3.** Adjusted Hazard Ratios for Morbidity With Follow-Up From 3/10/1994 to 12/31/2017

**eTable 4.** Adjusted Hazard Ratios for Non-CVD Mortality With Follow-Up From 2/23/1994 to 12/31/2017

**eTable 5.** Hazard Ratios Adjusted by Variables Selected Through Penalized Regression for All-Cause and CVD Mortality With Follow-Up From 2/23/1994 to 12/31/2017

**eTable 6.** Hazard Ratios Adjusted by Variables Selected Through Penalized Regression for Morbidity With Follow-Up From 3/10/1994 to 12/31/2017

**eTable 7.** Hazard Ratios Adjusted by Variables Selected Through Penalized Regression for Non-CVD Mortality With Follow-Up From 2/23/1994 to 12/31/2017

**eFigure 1A.** Kaplan-Meier Plots of Primary and Secondary Outcomes Through the Extended Follow-Up (by 12/31/2017)

**eFigure 1B.** Kaplan-Meier Plots of Primary and Secondary Outcomes Through the Extended Follow-Up (by 12/31/2017)

**eFigure 2A.** Unadjusted Hazard Ratios (95% CI) and Forest Plots of Overall and Subgroup Analyses of Mortality and Morbidity Outcomes Through the Extended Follow-Up (by 12/31/2017) – Amlodipine vs. Chlorthalidone and Lisinopril vs. Chlorthalidone

**eFigure 2B.** Unadjusted Hazard Ratios (95% CI) and Forest Plots of Overall and Subgroup Analyses of Mortality and Morbidity Outcomes Through the Extended Follow-Up (by 12/31/2017) – Amlodipine vs. Chlorthalidone and Lisinopril vs. Chlorthalidone

**eFigure 2C.** Unadjusted Hazard Ratios (95% CI) and Forest Plots of Overall and Subgroup Analyses of Mortality and Morbidity Outcomes Through the Extended Follow-Up (by 12/31/2017) – Amlodipine vs. Chlorthalidone and Lisinopril vs. Chlorthalidone

This supplementary material has been provided by the authors to give readers additional information about their work.

**eTable 1.** Baseline Characteristics for the Full Sample and by Randomized Group for Morbidity Study at the Time of Randomization

| Characteristic                                                                            | Participants, No. (%) (Unless otherwise indicated) |                |              |              | P value <sup>a</sup> |
|-------------------------------------------------------------------------------------------|----------------------------------------------------|----------------|--------------|--------------|----------------------|
|                                                                                           | Full Sample                                        | Chlorthalidone | Amlodipine   | Lisinopril   |                      |
| <b>At the recruitment in ALLHAT</b>                                                       |                                                    |                |              |              |                      |
| See previous references <sup>2</sup>                                                      |                                                    |                |              |              |                      |
| <b>Eligible for further follow-up as of 3/31/2002</b>                                     | 22754                                              | 10414          | 6191         | 6149         |                      |
| <b>Age, mean (SD), years</b>                                                              | 68.72 (7.2)                                        | 68.74 (7.2)    | 68.69 (7.2)  | 68.74 (7.3)  | 0.914                |
| <b>Age group at trial baseline</b>                                                        |                                                    |                |              |              |                      |
| <i>Age &lt;65</i>                                                                         | 7516 (33.0)                                        | 3411 (32.8)    | 2062 (33.3)  | 2043 (33.2)  | 0.712                |
| <i>Age ≥65</i>                                                                            | 15238 (67.0)                                       | 7003 (67.2)    | 4129 (66.7)  | 4106 (66.8)  |                      |
| <b>Gender</b>                                                                             |                                                    |                |              |              |                      |
| <i>Male</i>                                                                               | 9982 (43.9)                                        | 4570 (43.9)    | 2649 (42.8)  | 2763 (44.9)  | 0.056                |
| <i>Female</i>                                                                             | 12772 (56.1)                                       | 5844 (56.1)    | 3542 (57.2)  | 3386 (55.1)  |                      |
| <b>Race/Ethnicity</b>                                                                     |                                                    |                |              |              |                      |
| <i>Black</i>                                                                              | 8199 (36.0)                                        | 3748 (36.0)    | 2248 (36.3)  | 2203 (35.8)  | 0.848                |
| <i>Non-Black</i>                                                                          | 14555 (64.0)                                       | 6666 (64.0)    | 3943 (63.7)  | 3946 (64.2)  |                      |
| <b>Hispanic/Latino Ethnicity</b>                                                          |                                                    |                |              |              |                      |
| <i>Hispanic</i>                                                                           | 4872 (21.5)                                        | 2228 (21.5)    | 1294 (21.0)  | 1350 (22.1)  | 0.352                |
| <i>Non-Hispanic</i>                                                                       | 17756 (78.5)                                       | 8129 (78.5)    | 4864 (79.0)  | 4763 (77.9)  |                      |
| <b>Education, mean (SD), years</b>                                                        | 10.61 (4.2)                                        | 10.63 (4.1)    | 10.61 (4.1)  | 10.58 (4.3)  | 0.747                |
| <b>Education level at trial baseline</b>                                                  |                                                    |                |              |              |                      |
| <i>High school or less</i>                                                                | 15560 (74.1)                                       | 7088 (73.6)    | 4255 (74.3)  | 4217 (74.5)  | 0.408                |
| <i>More than high school</i>                                                              | 5448 (25.9)                                        | 2538 (26.4)    | 1469 (25.7)  | 1441 (25.5)  |                      |
| <b>Treatment with antihypertensive drugs prior to trial baseline</b>                      |                                                    |                |              |              |                      |
| <i>Treated</i>                                                                            | 20586 (90.5)                                       | 9403 (90.3)    | 5618 (90.7)  | 5565 (90.5)  | 0.639                |
| <i>Untreated</i>                                                                          | 2167 (9.5)                                         | 1010 (9.7)     | 573 (9.3)    | 584 (9.5)    |                      |
| <b>Aspirin use at trial baseline</b>                                                      | 7828 (34.9)                                        | 3573 (34.8)    | 2110 (34.5)  | 2145 (35.4)  | 0.575                |
| <b>Women taking estrogen at trial baseline</b>                                            | 1987 (15.8)                                        | 918 (16.0)     | 557 (16.0)   | 512 (15.4)   | 0.739                |
| <b>Mean Glomerular Filtration Rate (GFR) at trial baseline, mL/min/1.73 m<sup>2</sup></b> | 76.14 (19.8)                                       | 76.03 (19.9)   | 76.36 (19.7) | 76.10 (19.8) | 0.582                |
| <b>GFR &lt;60 mL/min/1.73 m<sup>2</sup> at trial baseline</b>                             | 4377 (20.2)                                        | 2019 (20.3)    | 1185 (20.1)  | 1173 (20.1)  | 0.924                |
| <b>HDL cholesterol at trial baseline, mean (SD), mg/dl</b>                                | 47.83 (14.9)                                       | 47.79 (15.0)   | 48.20 (15.0) | 47.54 (14.6) | 0.050                |
| <b>HDL &lt;35 mg/dl at trial baseline</b>                                                 | 2373 (10.4)                                        | 1083 (10.4)    | 646 (10.4)   | 644 (10.5)   | 0.989                |
| <b>Cigarette smoking at trial baseline</b>                                                |                                                    |                |              |              |                      |
| <i>Never smoker</i>                                                                       | 9701 (42.6)                                        | 4421 (42.5)    | 2682 (43.3)  | 2598 (42.3)  | 0.630                |
| <i>Current Smoker</i>                                                                     | 4301 (18.9)                                        | 1967 (18.9)    | 1178 (19.0)  | 1156 (18.8)  |                      |
| <i>Former Smoker</i>                                                                      | 8751 (38.5)                                        | 4026 (38.7)    | 2331 (37.7)  | 2394 (38.9)  |                      |
| <b>Diabetes classification at trial baseline</b>                                          |                                                    |                |              |              |                      |
| <i>Diabetes</i>                                                                           | 9133 (43.4)                                        | 4187 (43.5)    | 2499 (43.7)  | 2447 (42.9)  | 0.694                |
| <i>Non-diabetes</i>                                                                       | 11922 (56.6)                                       | 5443 (56.5)    | 3224 (56.3)  | 3255 (57.1)  |                      |
| <b>History of Coronary Heart Disease (CHD) at trial baseline</b>                          | 5743 (25.4)                                        | 2685 (26.0)    | 1511 (24.6)  | 1547 (25.3)  | 0.142                |

|                                                                                              |               |               |               |               |                  |
|----------------------------------------------------------------------------------------------|---------------|---------------|---------------|---------------|------------------|
| <b>Atherosclerotic Cardiovascular Disease (ASCVD) at trial baseline</b>                      | 12120 (53.3)  | 5597 (53.7)   | 3231 (52.2)   | 3292 (53.5)   | 0.133            |
| <b>History of myocardial infarction (MI) or stroke at trial baseline</b>                     | 5231 (23.0)   | 2424 (23.3)   | 1433 (23.1)   | 1374 (22.3)   | 0.366            |
| <b>History of coronary artery bypass graft (CABG) at trial baseline</b>                      | 2967 (13.0)   | 1380 (13.3)   | 746 (12.0)    | 841 (13.7)    | <b>0.019</b>     |
| <b>Other ASCVD at trial baseline</b>                                                         | 5774 (25.4)   | 2637 (25.3)   | 1556 (25.1)   | 1581 (25.7)   | 0.750            |
| <b>Major ST segment depression at trial baseline</b>                                         | 2394 (10.6)   | 1117 (10.8)   | 621 (10.1)    | 656 (10.8)    | 0.335            |
| <b>Hard Left ventricular hypertrophy (LVH) by Minnesota code at trial baseline</b>           | 1016 (5.3)    | 459 (5.2)     | 283 (5.4)     | 274 (5.3)     | 0.864            |
| <b>Lipid Lowering Trial (LLT) Participants</b>                                               | 5542 (24.4)   | 2569 (24.7)   | 1516 (24.5)   | 1457 (23.7)   | 0.355            |
| <b>BMI, mean (SD), kg/m<sup>2</sup> at trial baseline</b>                                    | 29.64 (6.2)   | 29.57 (6.2)   | 29.69 (6.2)   | 29.69 (6.2)   | 0.377            |
| <b>Obesity (BMI ≥ 30 kg/m<sup>2</sup>) at trial baseline</b>                                 | 9381 (41.2)   | 4266 (41.0)   | 2566 (41.4)   | 2549 (41.5)   | 0.759            |
| <b>Baseline blood pressure (BP) reading, mmHg</b>                                            |               |               |               |               |                  |
| <i>Systolic BP, mean (SD)</i>                                                                | 146.08 (13.1) | 146.07 (13.0) | 145.90 (13.2) | 146.30 (13.1) | 0.234            |
| <i>Diastolic BP, mean (SD)</i>                                                               | 83.45 (9.0)   | 83.50 (9.0)   | 83.30 (9.1)   | 83.51 (9.0)   | 0.320            |
| <b>Blood pressure change from baseline to the latest BP reading prior to 3/31/2002, mmHg</b> |               |               |               |               |                  |
| <i>Systolic BP, mean (SD)</i>                                                                | -9.90 (19.7)  | -10.54 (19.3) | -9.97 (19.3)  | -8.73 (20.5)  | <b>&lt;0.001</b> |
| <i>Diastolic BP, mean (SD)</i>                                                               | -6.49 (11.5)  | -6.56 (11.4)  | -6.81 (11.4)  | -6.06 (11.9)  | <b>&lt;0.001</b> |

N= number of participants; SD= standard deviation

<sup>a</sup> P values represent significance level of the chi-square test of independence between randomized groups for binary and categorical variables, or the one-way analysis of variance (ANOVA) between randomized groups for continuous variables. Statistically significant p values (<0.05) are shown in bold text.

Conversion factors: 1 mL/min/1.73m<sup>2</sup> = 0.0167 mL/s/m<sup>2</sup>; 1 mg/dl = 0.0259 mmol/L; 1 mmHg = 0.133 kPa

**eTable 2.** Adjusted<sup>a</sup> Hazard Ratios for All-Cause and CVD Mortality With Follow-up From 2/23/1994<sup>b</sup> to 12/31/2017

|                                                                      | All-Cause Mortality     |            | CVD Mortality           |            | CHD Mortality           |            | Stroke Mortality        |              | CHF Mortality           |            | Other CVD Mortality     |            |
|----------------------------------------------------------------------|-------------------------|------------|-------------------------|------------|-------------------------|------------|-------------------------|--------------|-------------------------|------------|-------------------------|------------|
|                                                                      | Adjusted HR<br>(95% CI) | P<br>value | Adjusted HR<br>(95% CI) | P<br>value | Adjusted HR<br>(95% CI) | P<br>value | Adjusted HR<br>(95% CI) | P<br>value   | Adjusted HR<br>(95% CI) | P<br>value | Adjusted HR<br>(95% CI) | P<br>value |
| <b>Randomized group</b>                                              |                         |            |                         |            |                         |            |                         |              |                         |            |                         |            |
| <i>Amlodipine vs. Chlorthalidone</i>                                 | 1.00 (0.96-1.03)        | 0.928      | 0.97 (0.89-1.05)        | 0.434      | 1.01 (0.94-1.10)        | 0.751      | 1.00 (0.86-1.16)        | 0.995        | 1.01 (0.85-1.21)        | 0.904      | 1.00 (0.91-1.11)        | 0.950      |
| <i>Lisinopril vs Chlorthalidone</i>                                  | 1.01 (0.97-1.04)        | 0.762      | 1.06 (0.97-1.15)        | 0.174      | 0.97 (0.90-1.06)        | 0.518      | <b>1.19 (1.03-1.37)</b> | <b>0.017</b> | 1.03 (0.86-1.22)        | 0.776      | 0.95 (0.85-1.05)        | 0.299      |
| <b>Age group at trial baseline</b>                                   |                         |            |                         |            |                         |            |                         |              |                         |            |                         |            |
| <i>Age &lt;65</i>                                                    | 1.00 (reference)        |            | 1.00 (reference)        |            | 1.00 (reference)        |            | 1.00 (reference)        |              | 1.00 (reference)        |            | 1.00 (reference)        |            |
| <i>Age ≥65</i>                                                       | 2.09 (2.02-2.16)        | <0.001     | 2.24 (2.06-2.43)        | <0.001     | 1.96 (1.82-2.11)        | <0.001     | 2.41 (2.09-2.78)        | <0.001       | 2.96 (2.47-3.54)        | <0.001     | 2.37 (2.14-2.61)        | <0.001     |
| <b>Gender</b>                                                        |                         |            |                         |            |                         |            |                         |              |                         |            |                         |            |
| <i>Male</i>                                                          | 1.00 (reference)        |            | 1.00 (reference)        |            | 1.00 (reference)        |            | 1.00 (reference)        |              | 1.00 (reference)        |            | 1.00 (reference)        |            |
| <i>Female</i>                                                        | 0.78 (0.75-0.80)        | <0.001     | 0.82 (0.76-0.89)        | <0.001     | 0.71 (0.65-0.76)        | <0.001     | 0.87 (0.76-1.00)        | 0.054        | 0.89 (0.76-1.05)        | 0.170      | 0.78 (0.71-0.86)        | <0.001     |
| <b>Race/Ethnicity</b>                                                |                         |            |                         |            |                         |            |                         |              |                         |            |                         |            |
| <i>Non-Black</i>                                                     | 1.00 (reference)        |            | 1.00 (reference)        |            | 1.00 (reference)        |            | 1.00 (reference)        |              | 1.00 (reference)        |            | 1.00 (reference)        |            |
| <i>Black</i>                                                         | 0.98 (0.95-1.02)        | 0.306      | 0.95 (0.87-1.03)        | 0.211      | 0.95 (0.88-1.03)        | 0.184      | 0.95 (0.82-1.09)        | 0.477        | 0.94 (0.79-1.12)        | 0.514      | 1.21 (1.10-1.33)        | <0.001     |
| <b>Hispanic/Latino Ethnicity</b>                                     |                         |            |                         |            |                         |            |                         |              |                         |            |                         |            |
| <i>Non-Hispanic</i>                                                  | 1.00 (reference)        |            | 1.00 (reference)        |            | 1.00 (reference)        |            | 1.00 (reference)        |              | 1.00 (reference)        |            | 1.00 (reference)        |            |
| <i>Hispanic</i>                                                      | 0.79 (0.76-0.83)        | <0.001     | 0.86 (0.77-0.95)        | 0.004      | 0.78 (0.71-0.87)        | <0.001     | 0.76 (0.63-0.91)        | 0.003        | 0.70 (0.55-0.88)        | 0.003      | 0.70 (0.61-0.80)        | <0.001     |
| <b>Education level at trial baseline</b>                             |                         |            |                         |            |                         |            |                         |              |                         |            |                         |            |
| <i>More than high school</i>                                         | 1.00 (reference)        |            | 1.00 (reference)        |            | 1.00 (reference)        |            | 1.00 (reference)        |              | 1.00 (reference)        |            | 1.00 (reference)        |            |
| <i>High school or less</i>                                           | 1.17 (1.13-1.21)        | <0.001     | 1.19 (1.10-1.30)        | <0.001     | 1.22 (1.13-1.32)        | <0.001     | 1.11 (0.97-1.27)        | 0.145        | 1.16 (0.98-1.38)        | 0.078      | 1.04 (0.94-1.14)        | 0.467      |
| <b>Treatment with antihypertensive drugs prior to trial baseline</b> |                         |            |                         |            |                         |            |                         |              |                         |            |                         |            |
| <i>Untreated</i>                                                     | 1.00 (reference)        |            | 1.00 (reference)        |            | 1.00 (reference)        |            | 1.00 (reference)        |              | 1.00 (reference)        |            | 1.00 (reference)        |            |
| <i>Treated</i>                                                       | 1.10 (1.04-1.16)        | <0.001     | 1.13 (0.99-1.30)        | 0.061      | 1.09 (0.97-1.23)        | 0.163      | 1.34 (1.06-1.70)        | 0.014        | 0.98 (0.75-1.30)        | 0.902      | 1.05 (0.91-1.23)        | 0.493      |
| <b>Aspirin use at trial baseline</b>                                 |                         |            |                         |            |                         |            |                         |              |                         |            |                         |            |
| <i>No</i>                                                            | 1.00 (reference)        |            | 1.00 (reference)        |            | 1.00 (reference)        |            | 1.00 (reference)        |              | 1.00 (reference)        |            | 1.00 (reference)        |            |
| <i>Yes</i>                                                           | 0.99 (0.96-1.03)        | 0.629      | 1.05 (0.97-1.14)        | 0.231      | 0.98 (0.91-1.06)        | 0.595      | 1.14 (0.99-1.30)        | 0.062        | 0.97 (0.83-1.15)        | 0.758      | 1.07 (0.97-1.18)        | 0.150      |
| <b>GFR &lt;60 mL/min/1.73 m<sup>2</sup> at trial baseline</b>        |                         |            |                         |            |                         |            |                         |              |                         |            |                         |            |
| <i>No</i>                                                            | 1.00 (reference)        |            | 1.00 (reference)        |            | 1.00 (reference)        |            | 1.00 (reference)        |              | 1.00 (reference)        |            | 1.00 (reference)        |            |
| <i>Yes</i>                                                           | 1.50 (1.44-1.55)        | <0.001     | 1.60 (1.46-1.74)        | <0.001     | 1.48 (1.37-1.61)        | <0.001     | 1.60 (1.38-1.85)        | <0.001       | 1.72 (1.44-2.04)        | <0.001     | 1.62 (1.46-1.81)        | <0.001     |
| <b>HDL cholesterol &lt;35 mg/dl at trial baseline</b>                |                         |            |                         |            |                         |            |                         |              |                         |            |                         |            |
| <i>No</i>                                                            | 1.00 (reference)        |            | 1.00 (reference)        |            | 1.00 (reference)        |            | 1.00 (reference)        |              | 1.00 (reference)        |            | 1.00 (reference)        |            |
| <i>Yes</i>                                                           | 0.90 (0.86-0.95)        | <0.001     | 0.86 (0.77-0.97)        | 0.012      | 1.01 (0.91-1.11)        | 0.920      | 0.70 (0.57-0.87)        | 0.001        | 0.83 (0.65-1.05)        | 0.126      | 0.84 (0.73-0.97)        | 0.018      |
| <b>Cigarette smoking at trial baseline</b>                           |                         |            |                         |            |                         |            |                         |              |                         |            |                         |            |

|                                                                          | All-Cause Mortality     |            | CVD Mortality           |            | CHD Mortality           |            | Stroke Mortality        |            | CHF Mortality           |            | Other CVD Mortality     |            |
|--------------------------------------------------------------------------|-------------------------|------------|-------------------------|------------|-------------------------|------------|-------------------------|------------|-------------------------|------------|-------------------------|------------|
|                                                                          | Adjusted HR<br>(95% CI) | P<br>value | Adjusted HR<br>(95% CI) | P<br>value | Adjusted HR<br>(95% CI) | P<br>value | Adjusted HR<br>(95% CI) | P<br>value | Adjusted HR<br>(95% CI) | P<br>value | Adjusted HR<br>(95% CI) | P<br>value |
| <i>Never smoker</i>                                                      | 1.00 (reference)        |            | 1.00 (reference)        |            | 1.00 (reference)        |            | 1.00 (reference)        |            | 1.00 (reference)        |            | 1.00 (reference)        |            |
| <i>Current smoker</i>                                                    | 1.69 (1.62-1.77)        | <0.001     | 1.31 (1.18-1.46)        | <0.001     | 1.49 (1.35-1.65)        | <0.001     | 1.11 (0.93-1.34)        | 0.248      | 1.19 (0.94-1.50)        | 0.142      | 1.48 (1.31-1.68)        | <0.001     |
| <i>Former Smoker</i>                                                     | 1.11 (1.07-1.15)        | <0.001     | 1.04 (0.96-1.13)        | 0.313      | 1.12 (1.04-1.22)        | 0.004      | 0.95 (0.82-1.10)        | 0.479      | 0.98 (0.83-1.17)        | 0.853      | 1.07 (0.96-1.18)        | 0.206      |
| <b>Diabetes classification at trial baseline</b>                         |                         |            |                         |            |                         |            |                         |            |                         |            |                         |            |
| <i>Non-diabetes</i>                                                      | 1.00 (reference)        |            | 1.00 (reference)        |            | 1.00 (reference)        |            | 1.00 (reference)        |            | 1.00 (reference)        |            | 1.00 (reference)        |            |
| <i>Diabetes</i>                                                          | 1.53 (1.48-1.58)        | <0.001     | 1.65 (1.53-1.78)        | <0.001     | 1.69 (1.57-1.81)        | <0.001     | 1.45 (1.26-1.65)        | <0.001     | 1.76 (1.50-2.06)        | <0.001     | 1.28 (1.17-1.41)        | <0.001     |
| <b>History of Coronary Heart Disease (CHD) at trial baseline</b>         |                         |            |                         |            |                         |            |                         |            |                         |            |                         |            |
| <i>No</i>                                                                | 1.00 (reference)        |            | 1.00 (reference)        |            | 1.00 (reference)        |            | 1.00 (reference)        |            | 1.00 (reference)        |            | 1.00 (reference)        |            |
| <i>Yes</i>                                                               | 0.96 (0.92-1.01)        | 0.085      | 0.91 (0.82-1.01)        | 0.088      | 1.08 (0.98-1.19)        | 0.122      | 0.85 (0.71-1.02)        | 0.080      | 1.03 (0.83-1.28)        | 0.791      | 0.88 (0.77-1.01)        | 0.062      |
| <b>Atherosclerotic Cardiovascular Disease (ASCVD) at trial baseline</b>  |                         |            |                         |            |                         |            |                         |            |                         |            |                         |            |
| <i>No</i>                                                                | 1.00 (reference)        |            | 1.00 (reference)        |            | 1.00 (reference)        |            | 1.00 (reference)        |            | 1.00 (reference)        |            | 1.00 (reference)        |            |
| <i>Yes</i>                                                               | 1.09 (1.03-1.16)        | 0.002      | 1.23 (1.08-1.40)        | 0.002      | 1.14 (1.01-1.29)        | 0.030      | 1.04 (0.83-1.31)        | 0.734      | 1.50 (1.14-1.97)        | 0.004      | 1.15 (0.97-1.35)        | 0.103      |
| <b>History of myocardial infarction (MI) or stroke at trial baseline</b> |                         |            |                         |            |                         |            |                         |            |                         |            |                         |            |
| <i>No</i>                                                                | 1.00 (reference)        |            | 1.00 (reference)        |            | 1.00 (reference)        |            | 1.00 (reference)        |            | 1.00 (reference)        |            | 1.00 (reference)        |            |
| <i>Yes</i>                                                               | 1.28 (1.22-1.34)        | <0.001     | 1.43 (1.28-1.59)        | <0.001     | 1.49 (1.35-1.64)        | <0.001     | 1.54 (1.27-1.87)        | <0.001     | 1.04 (0.83-1.30)        | 0.736      | 1.30 (1.13-1.50)        | <0.001     |
| <b>History of coronary artery bypass graft (CABG) at trial baseline</b>  |                         |            |                         |            |                         |            |                         |            |                         |            |                         |            |
| <i>No</i>                                                                | 1.00 (reference)        |            | 1.00 (reference)        |            | 1.00 (reference)        |            | 1.00 (reference)        |            | 1.00 (reference)        |            | 1.00 (reference)        |            |
| <i>Yes</i>                                                               | 1.11 (1.05-1.17)        | <0.001     | 1.20 (1.07-1.35)        | 0.002      | 1.41 (1.28-1.57)        | <0.001     | 0.97 (0.78-1.19)        | 0.748      | 1.20 (0.94-1.54)        | 0.141      | 1.03 (0.88-1.20)        | 0.732      |
| <b>Other ASCVD at trial baseline</b>                                     |                         |            |                         |            |                         |            |                         |            |                         |            |                         |            |
| <i>No</i>                                                                | 1.00 (reference)        |            | 1.00 (reference)        |            | 1.00 (reference)        |            | 1.00 (reference)        |            | 1.00 (reference)        |            | 1.00 (reference)        |            |
| <i>Yes</i>                                                               | 1.15 (1.09-1.20)        | <0.001     | 1.13 (1.02-1.26)        | 0.020      | 1.19 (1.09-1.31)        | <0.001     | 1.31 (1.08-1.57)        | 0.005      | 0.90 (0.72-1.13)        | 0.363      | 1.06 (0.92-1.21)        | 0.433      |
| <b>Major ST segment depression at trial baseline</b>                     |                         |            |                         |            |                         |            |                         |            |                         |            |                         |            |
| <i>No</i>                                                                | 1.00 (reference)        |            | 1.00 (reference)        |            | 1.00 (reference)        |            | 1.00 (reference)        |            | 1.00 (reference)        |            | 1.00 (reference)        |            |
| <i>Yes</i>                                                               | 0.97 (0.92-1.03)        | 0.335      | 0.95 (0.84-1.09)        | 0.479      | 0.98 (0.87-1.10)        | 0.704      | 0.95 (0.76-1.19)        | 0.660      | 0.89 (0.68-1.17)        | 0.412      | 0.91 (0.77-1.07)        | 0.247      |
| <b>LVH by Minnesota code at trial baseline</b>                           |                         |            |                         |            |                         |            |                         |            |                         |            |                         |            |
| <i>No/Soft LVH</i>                                                       | 1.00 (reference)        |            | 1.00 (reference)        |            | 1.00 (reference)        |            | 1.00 (reference)        |            | 1.00 (reference)        |            | 1.00 (reference)        |            |
| <i>Hard LVH</i>                                                          | 1.33 (1.25-1.42)        | <0.001     | 1.68 (1.46-1.92)        | <0.001     | 1.53 (1.34-1.75)        | <0.001     | 1.73 (1.37-2.18)        | <0.001     | 1.89 (1.44-2.49)        | <0.001     | 1.63 (1.38-1.93)        | <0.001     |
| <b>Lipid Lowering Trial (LLT) Participant</b>                            |                         |            |                         |            |                         |            |                         |            |                         |            |                         |            |
| <i>No</i>                                                                | 1.00 (reference)        |            | 1.00 (reference)        |            | 1.00 (reference)        |            | 1.00 (reference)        |            | 1.00 (reference)        |            | 1.00 (reference)        |            |
| <i>Yes</i>                                                               | 0.93 (0.90-0.97)        | <0.001     | 0.95 (0.88-1.03)        | 0.238      | 0.98 (0.91-1.06)        | 0.605      | 0.99 (0.86-1.14)        | 0.863      | 0.85 (0.71-1.02)        | 0.077      | 1.01 (0.92-1.11)        | 0.844      |
| <b>Obesity (BMI ≥ 30 kg/m<sup>2</sup>) at trial baseline</b>             |                         |            |                         |            |                         |            |                         |            |                         |            |                         |            |
| <i>No</i>                                                                | 1.00 (reference)        |            | 1.00 (reference)        |            | 1.00 (reference)        |            | 1.00 (reference)        |            | 1.00 (reference)        |            | 1.00 (reference)        |            |
| <i>Yes</i>                                                               | 0.96 (0.93-0.99)        | 0.008      | 0.99 (0.92-1.06)        | 0.753      | 0.99 (0.93-1.06)        | 0.862      | 0.86 (0.76-0.98)        | 0.025      | 1.15 (0.99-1.34)        | 0.064      | 0.98 (0.89-1.07)        | 0.599      |
| <b>Baseline blood pressure reading, per 10 mmHg</b>                      |                         |            |                         |            |                         |            |                         |            |                         |            |                         |            |
| <i>Systolic BP</i>                                                       | 1.11 (1.09-1.12)        | <0.001     | 1.12 (1.08-1.15)        | <0.001     | 1.15 (1.11-1.18)        | <0.001     | 1.13 (1.07-1.20)        | <0.001     | 1.10 (1.03-1.17)        | 0.005      | 1.11 (1.07-1.16)        | <0.001     |

|                     | All-Cause Mortality     |            | CVD Mortality           |            | CHD Mortality           |            | Stroke Mortality        |            | CHF Mortality           |            | Other CVD Mortality     |            |
|---------------------|-------------------------|------------|-------------------------|------------|-------------------------|------------|-------------------------|------------|-------------------------|------------|-------------------------|------------|
|                     | Adjusted HR<br>(95% CI) | P<br>value | Adjusted HR<br>(95% CI) | P<br>value | Adjusted HR<br>(95% CI) | P<br>value | Adjusted HR<br>(95% CI) | P<br>value | Adjusted HR<br>(95% CI) | P<br>value | Adjusted HR<br>(95% CI) | P<br>value |
| <i>Diastolic BP</i> | 0.88 (0.86-0.90)        | <0.001     | 0.90 (0.86-0.94)        | <0.001     | 0.87 (0.84-0.91)        | <0.001     | 0.99 (0.91-1.07)        | 0.759      | 0.78 (0.71-0.86)        | <0.001     | 0.95 (0.90-1.01)        | 0.079      |

HR= Hazard ratio; 95% CI= 95% Confidence interval; CHD= coronary heart disease; CVD= cardiovascular disease; ASCVD= Atherosclerotic Cardiovascular Disease; OASCVD= Other ASCVD; HDL= high density lipoprotein; eGFR= estimated glomerular filtration rate; LVH= left ventricular hypertrophy; SBP= systolic blood pressure; DBP= diastolic blood pressure

<sup>a</sup> Adjusted for each covariate shown in that column. Covariates not included in multivariable analysis are indicated with dashes.

<sup>b</sup> First randomization date in the Mortality cohort.

Conversion factors: 1 mL/min/1.73m<sup>2</sup> = 0.0167 mL/s/m<sup>2</sup>; 1 mg/dl = 0.0259 mmol/L; 1 mmHg = 0.133 kPa

**eTable 3.** Adjusted<sup>a</sup> Hazard Ratios for Morbidity With Follow-up From 3/10/1994<sup>b</sup> to 12/31/2017

|                                                                      | CVD Morbidity           |            | CHD Morbidity           |            | CHF Morbidity           |            | Stroke Morbidity        |              | Cancer Morbidity        |            | Kidney Disease Morbidity |            |
|----------------------------------------------------------------------|-------------------------|------------|-------------------------|------------|-------------------------|------------|-------------------------|--------------|-------------------------|------------|--------------------------|------------|
|                                                                      | Adjusted HR<br>(95% CI) | P<br>value | Adjusted HR<br>(95% CI) | P<br>value | Adjusted HR<br>(95% CI) | P<br>value | Adjusted HR<br>(95% CI) | P<br>value   | Adjusted HR<br>(95% CI) | P<br>value | Adjusted HR<br>(95% CI)  | P<br>value |
| <b>Randomized group</b>                                              |                         |            |                         |            |                         |            |                         |              |                         |            |                          |            |
| <i>Amlodipine vs. Chlorthalidone</i>                                 | 1.01 (0.96-1.06)        | 0.628      | 0.99 (0.92-1.06)        | 0.795      | 1.02 (0.97-1.09)        | 0.426      | 1.04 (0.96-1.12)        | 0.389        | 0.99 (0.92-1.07)        | 0.842      | 1.05 (0.90-1.22)         | 0.535      |
| <i>Lisinopril vs Chlorthalidone</i>                                  | 1.04 (0.99-1.09)        | 0.157      | 0.98 (0.91-1.05)        | 0.508      | 1.03 (0.97-1.09)        | 0.412      | <b>1.11 (1.03-1.20)</b> | <b>0.008</b> | 1.02 (0.94-1.10)        | 0.632      | 1.12 (0.97-1.30)         | 0.117      |
| <b>Age group at trial baseline</b>                                   |                         |            |                         |            |                         |            |                         |              |                         |            |                          |            |
| <i>Age &lt;65</i>                                                    | 1.00 (reference)        |            | 1.00 (reference)        |            | 1.00 (reference)        |            | 1.00 (reference)        |              | 1.00 (reference)        |            | 1.00 (reference)         |            |
| <i>Age ≥65</i>                                                       | 1.76 (1.67-1.84)        | <0.001     | 1.66 (1.55-1.78)        | <0.001     | 1.84 (1.74-1.95)        | <0.001     | 1.77 (1.63-1.91)        | <0.001       | 1.63 (1.51-1.76)        | <0.001     | 1.02 (0.89-1.17)         | 0.807      |
| <b>Gender</b>                                                        |                         |            |                         |            |                         |            |                         |              |                         |            |                          |            |
| <i>Male</i>                                                          | 1.00 (reference)        |            | 1.00 (reference)        |            | 1.00 (reference)        |            | 1.00 (reference)        |              | 1.00 (reference)        |            | 1.00 (reference)         |            |
| <i>Female</i>                                                        | 0.91 (0.87-0.96)        | <0.001     | 0.80 (0.75-0.86)        | <0.001     | 0.96 (0.91-1.02)        | 0.151      | 0.94 (0.88-1.01)        | 0.117        | 0.69 (0.64-0.74)        | <0.001     | 0.63 (0.55-0.73)         | <0.001     |
| <b>Race/Ethnicity</b>                                                |                         |            |                         |            |                         |            |                         |              |                         |            |                          |            |
| <i>Non-Black</i>                                                     | 1.00 (reference)        |            | 1.00 (reference)        |            | 1.00 (reference)        |            | 1.00 (reference)        |              | 1.00 (reference)        |            | 1.00 (reference)         |            |
| <i>Black</i>                                                         | 0.97 (0.93-1.02)        | 0.265      | 0.90 (0.84-0.97)        | 0.006      | 0.99 (0.93-1.04)        | 0.630      | 1.03 (0.95-1.11)        | 0.481        | 1.05 (0.97-1.13)        | 0.214      | 1.92 (1.67-2.21)         | <0.001     |
| <b>Hispanic/Latino Ethnicity</b>                                     |                         |            |                         |            |                         |            |                         |              |                         |            |                          |            |
| <i>Non-Hispanic</i>                                                  | 1.00 (reference)        |            | 1.00 (reference)        |            | 1.00 (reference)        |            | 1.00 (reference)        |              | 1.00 (reference)        |            | 1.00 (reference)         |            |
| <i>Hispanic</i>                                                      | 0.72 (0.68-0.77)        | <0.001     | 0.80 (0.73-0.87)        | <0.001     | 0.63 (0.59-0.68)        | <0.001     | 0.76 (0.69-0.84)        | <0.001       | 0.63 (0.56-0.69)        | <0.001     | 1.02 (0.85-1.22)         | 0.836      |
| <b>Education level at trial baseline</b>                             |                         |            |                         |            |                         |            |                         |              |                         |            |                          |            |
| <i>More than high school</i>                                         | 1.00 (reference)        |            | 1.00 (reference)        |            | 1.00 (reference)        |            | 1.00 (reference)        |              | 1.00 (reference)        |            | 1.00 (reference)         |            |
| <i>High school or less</i>                                           | 1.19 (1.13-1.25)        | <0.001     | 1.20 (1.12-1.29)        | <0.001     | 1.19 (1.12-1.26)        | <0.001     | 1.14 (1.06-1.23)        | <0.001       | 1.12 (1.04-1.21)        | 0.003      | 1.06 (0.92-1.23)         | 0.407      |
| <b>Treatment with antihypertensive drugs prior to trial baseline</b> |                         |            |                         |            |                         |            |                         |              |                         |            |                          |            |
| <i>Untreated</i>                                                     | 1.00 (reference)        |            | 1.00 (reference)        |            | 1.00 (reference)        |            | 1.00 (reference)        |              | 1.00 (reference)        |            | 1.00 (reference)         |            |
| <i>Treated</i>                                                       | 1.27 (1.17-1.38)        | <0.001     | 1.09 (0.97-1.21)        | 0.132      | 1.23 (1.12-1.35)        | <0.001     | 1.36 (1.19-1.54)        | <0.001       | 1.08 (0.96-1.22)        | 0.184      | 1.29 (1.02-1.63)         | 0.031      |
| <b>Aspirin use at trial baseline</b>                                 |                         |            |                         |            |                         |            |                         |              |                         |            |                          |            |
| <i>No</i>                                                            | 1.00 (reference)        |            | 1.00 (reference)        |            | 1.00 (reference)        |            | 1.00 (reference)        |              | 1.00 (reference)        |            | 1.00 (reference)         |            |
| <i>Yes</i>                                                           | 1.06 (1.01-1.11)        | 0.018      | 1.05 (0.98-1.12)        | 0.151      | 1.02 (0.96-1.08)        | 0.490      | 1.15 (1.07-1.23)        | <0.001       | 0.91 (0.84-0.98)        | 0.013      | 0.90 (0.78-1.04)         | 0.141      |
| <b>GFR &lt;60 mL/min/1.73 m<sup>2</sup> at trial baseline</b>        |                         |            |                         |            |                         |            |                         |              |                         |            |                          |            |
| <i>No</i>                                                            | 1.00 (reference)        |            | 1.00 (reference)        |            | 1.00 (reference)        |            | 1.00 (reference)        |              | 1.00 (reference)        |            | 1.00 (reference)         |            |
| <i>Yes</i>                                                           | 1.42 (1.34-1.49)        | <0.001     | 1.42 (1.32-1.53)        | <0.001     | 1.55 (1.46-1.65)        | <0.001     | 1.31 (1.21-1.42)        | <0.001       | 1.19 (1.09-1.29)        | <0.001     | 5.30 (4.66-6.04)         | <0.001     |
| <b>HDL cholesterol &lt;35 mg/dl at trial baseline</b>                |                         |            |                         |            |                         |            |                         |              |                         |            |                          |            |
| <i>No</i>                                                            | 1.00 (reference)        |            | 1.00 (reference)        |            | 1.00 (reference)        |            | 1.00 (reference)        |              | 1.00 (reference)        |            | 1.00 (reference)         |            |
| <i>Yes</i>                                                           | 0.96 (0.90-1.03)        | 0.260      | 1.09 (0.99-1.19)        | 0.078      | 0.94 (0.87-1.02)        | 0.160      | 0.89 (0.80-0.99)        | 0.040        | 1.05 (0.95-1.16)        | 0.354      | 1.01 (0.82-1.25)         | 0.920      |
| <b>Cigarette smoking at trial baseline</b>                           |                         |            |                         |            |                         |            |                         |              |                         |            |                          |            |

|                                                                          | CVD Morbidity           |            | CHD Morbidity           |            | CHF Morbidity           |            | Stroke Morbidity        |            | Cancer Morbidity        |            | Kidney Disease Morbidity |            |
|--------------------------------------------------------------------------|-------------------------|------------|-------------------------|------------|-------------------------|------------|-------------------------|------------|-------------------------|------------|--------------------------|------------|
|                                                                          | Adjusted HR<br>(95% CI) | P<br>value | Adjusted HR<br>(95% CI) | P<br>value | Adjusted HR<br>(95% CI) | P<br>value | Adjusted HR<br>(95% CI) | P<br>value | Adjusted HR<br>(95% CI) | P<br>value | Adjusted HR<br>(95% CI)  | P<br>value |
| <i>Never smoker</i>                                                      | 1.00 (reference)        |            | 1.00 (reference)        |            | 1.00 (reference)        |            | 1.00 (reference)        |            | 1.00 (reference)        |            | 1.00 (reference)         |            |
| <i>Current smoker</i>                                                    | 1.42 (1.33-1.51)        | <0.001     | 1.50 (1.37-1.64)        | <0.001     | 1.40 (1.30-1.51)        | <0.001     | 1.42 (1.29-1.57)        | <0.001     | 2.08 (1.90-2.28)        | <0.001     | 1.79 (1.49-2.14)         | <0.001     |
| <i>Former Smoker</i>                                                     | 1.09 (1.04-1.15)        | <0.001     | 1.13 (1.05-1.21)        | <0.001     | 1.08 (1.02-1.14)        | 0.009      | 1.11 (1.03-1.20)        | 0.008      | 1.24 (1.15-1.35)        | <0.001     | 1.23 (1.07-1.43)         | 0.004      |
| <b>Diabetes classification at trial baseline</b>                         |                         |            |                         |            |                         |            |                         |            |                         |            |                          |            |
| <i>Non-diabetes</i>                                                      | 1.00 (reference)        |            | 1.00 (reference)        |            | 1.00 (reference)        |            | 1.00 (reference)        |            | 1.00 (reference)        |            | 1.00 (reference)         |            |
| <i>Diabetes</i>                                                          | 1.57 (1.50-1.64)        | <0.001     | 1.70 (1.59-1.81)        | <0.001     | 1.69 (1.60-1.79)        | <0.001     | 1.49 (1.38-1.60)        | <0.001     | 1.11 (1.03-1.20)        | 0.004      | 3.01 (2.62-3.45)         | <0.001     |
| <b>History of Coronary Heart Disease (CHD) at trial baseline</b>         |                         |            |                         |            |                         |            |                         |            |                         |            |                          |            |
| <i>No</i>                                                                | 1.00 (reference)        |            | 1.00 (reference)        |            | 1.00 (reference)        |            | 1.00 (reference)        |            | 1.00 (reference)        |            | 1.00 (reference)         |            |
| <i>Yes</i>                                                               | 0.97 (0.91-1.03)        | 0.283      | 1.08 (0.99-1.18)        | 0.074      | 1.06 (0.98-1.14)        | 0.121      | 0.84 (0.76-0.93)        | <0.001     | 0.96 (0.87-1.07)        | 0.464      | 0.86 (0.71-1.05)         | 0.147      |
| <b>Atherosclerotic Cardiovascular Disease (ASCVD) at trial baseline</b>  |                         |            |                         |            |                         |            |                         |            |                         |            |                          |            |
| <i>No</i>                                                                | 1.00 (reference)        |            | 1.00 (reference)        |            | 1.00 (reference)        |            | 1.00 (reference)        |            | 1.00 (reference)        |            | 1.00 (reference)         |            |
| <i>Yes</i>                                                               | 1.13 (1.05-1.23)        | 0.002      | 1.13 (1.01-1.26)        | 0.030      | 1.11 (1.01-1.22)        | 0.025      | 1.13 (1.00-1.27)        | 0.050      | 0.98 (0.87-1.11)        | 0.772      | 1.00 (0.79-1.27)         | 0.996      |
| <b>History of myocardial infarction (MI) or stroke at trial baseline</b> |                         |            |                         |            |                         |            |                         |            |                         |            |                          |            |
| <i>No</i>                                                                | 1.00 (reference)        |            | 1.00 (reference)        |            | 1.00 (reference)        |            | 1.00 (reference)        |            | 1.00 (reference)        |            | 1.00 (reference)         |            |
| <i>Yes</i>                                                               | 1.39 (1.30-1.48)        | <0.001     | 1.40 (1.29-1.53)        | <0.001     | 1.36 (1.26-1.46)        | <0.001     | 1.39 (1.25-1.53)        | <0.001     | 1.08 (0.97-1.20)        | 0.142      | 1.22 (0.99-1.49)         | 0.060      |
| <b>History of coronary artery bypass graft (CABG) at trial baseline</b>  |                         |            |                         |            |                         |            |                         |            |                         |            |                          |            |
| <i>No</i>                                                                | 1.00 (reference)        |            | 1.00 (reference)        |            | 1.00 (reference)        |            | 1.00 (reference)        |            | 1.00 (reference)        |            | 1.00 (reference)         |            |
| <i>Yes</i>                                                               | 1.26 (1.18-1.36)        | <0.001     | 1.41 (1.28-1.55)        | <0.001     | 1.24 (1.14-1.35)        | <0.001     | 1.32 (1.18-1.47)        | <0.001     | 1.05 (0.93-1.18)        | 0.451      | 1.36 (1.08-1.71)         | 0.009      |
| <b>Other ASCVD at trial baseline</b>                                     |                         |            |                         |            |                         |            |                         |            |                         |            |                          |            |
| <i>No</i>                                                                | 1.00 (reference)        |            | 1.00 (reference)        |            | 1.00 (reference)        |            | 1.00 (reference)        |            | 1.00 (reference)        |            | 1.00 (reference)         |            |
| <i>Yes</i>                                                               | 1.12 (1.05-1.19)        | <0.001     | 1.14 (1.05-1.24)        | 0.003      | 1.10 (1.03-1.19)        | 0.008      | 1.16 (1.05-1.28)        | 0.003      | 1.18 (1.06-1.31)        | 0.002      | 1.11 (0.90-1.35)         | 0.329      |
| <b>Major ST segment depression at trial baseline</b>                     |                         |            |                         |            |                         |            |                         |            |                         |            |                          |            |
| <i>No</i>                                                                | 1.00 (reference)        |            | 1.00 (reference)        |            | 1.00 (reference)        |            | 1.00 (reference)        |            | 1.00 (reference)        |            | 1.00 (reference)         |            |
| <i>Yes</i>                                                               | 1.03 (0.95-1.11)        | 0.433      | 0.95 (0.85-1.06)        | 0.358      | 1.11 (1.02-1.22)        | 0.018      | 0.94 (0.83-1.06)        | 0.336      | 1.09 (0.96-1.23)        | 0.176      | 1.17 (0.93-1.48)         | 0.188      |
| <b>LVH by Minnesota code at trial baseline</b>                           |                         |            |                         |            |                         |            |                         |            |                         |            |                          |            |
| <i>No/Soft LVH</i>                                                       | 1.00 (reference)        |            | 1.00 (reference)        |            | 1.00 (reference)        |            | 1.00 (reference)        |            | 1.00 (reference)        |            | 1.00 (reference)         |            |
| <i>Hard LVH</i>                                                          | 1.55 (1.42-1.69)        | <0.001     | 1.46 (1.28-1.65)        | <0.001     | 1.73 (1.57-1.91)        | <0.001     | 1.48 (1.30-1.69)        | <0.001     | 0.99 (0.85-1.16)        | 0.924      | 1.35 (1.07-1.72)         | 0.013      |
| <b>Lipid Lowering Trial (LLT) Participant</b>                            |                         |            |                         |            |                         |            |                         |            |                         |            |                          |            |
| <i>No</i>                                                                | 1.00 (reference)        |            | 1.00 (reference)        |            | 1.00 (reference)        |            | 1.00 (reference)        |            | 1.00 (reference)        |            | 1.00 (reference)         |            |
| <i>Yes</i>                                                               | 0.94 (0.90-0.99)        | 0.020      | 0.94 (0.87-1.01)        | 0.080      | 0.94 (0.89-1.00)        | 0.038      | 0.95 (0.88-1.02)        | 0.162      | 0.93 (0.86-1.00)        | 0.063      | 1.00 (0.87-1.15)         | 0.986      |
| <b>Obesity (BMI ≥ 30 kg/m<sup>2</sup>) at trial baseline</b>             |                         |            |                         |            |                         |            |                         |            |                         |            |                          |            |
| <i>No</i>                                                                | 1.00 (reference)        |            | 1.00 (reference)        |            | 1.00 (reference)        |            | 1.00 (reference)        |            | 1.00 (reference)        |            | 1.00 (reference)         |            |
| <i>Yes</i>                                                               | 1.09 (1.05-1.14)        | <0.001     | 0.94 (0.88-1.00)        | 0.054      | 1.25 (1.19-1.32)        | <0.001     | 0.94 (0.88-1.01)        | 0.106      | 1.01 (0.94-1.08)        | 0.881      | 1.19 (1.04-1.35)         | 0.009      |
| <b>Baseline blood pressure reading, per 10 mmHg</b>                      |                         |            |                         |            |                         |            |                         |            |                         |            |                          |            |
| <i>Systolic BP</i>                                                       | 1.11 (1.09-1.14)        | <0.001     | 1.13 (1.10-1.16)        | <0.001     | 1.12 (1.10-1.15)        | <0.001     | 1.16 (1.13-1.20)        | <0.001     | 1.02 (0.99-1.05)        | 0.269      | 1.32 (1.24-1.39)         | <0.001     |



|                     | CVD Morbidity           |            | CHD Morbidity           |            | CHF Morbidity           |            | Stroke Morbidity        |            | Cancer Morbidity        |            | Kidney Disease Morbidity |            |
|---------------------|-------------------------|------------|-------------------------|------------|-------------------------|------------|-------------------------|------------|-------------------------|------------|--------------------------|------------|
|                     | Adjusted HR<br>(95% CI) | P<br>value | Adjusted HR<br>(95% CI) | P<br>value | Adjusted HR<br>(95% CI) | P<br>value | Adjusted HR<br>(95% CI) | P<br>value | Adjusted HR<br>(95% CI) | P<br>value | Adjusted HR<br>(95% CI)  | P<br>value |
| <i>Diastolic BP</i> | 0.89 (0.86-0.91)        | <0.001     | 0.91 (0.88-0.95)        | <0.001     | 0.86 (0.83-0.89)        | <0.001     | 0.91 (0.87-0.95)        | <0.001     | 0.92 (0.88-0.96)        | <0.001     | 0.89 (0.82-0.96)         | 0.005      |

HR= Hazard ratio; 95% CI= 95% Confidence interval; CHD= coronary heart disease; CVD= cardiovascular disease; ASCVD= Atherosclerotic Cardiovascular Disease; OASCVD= Other ASCVD; HDL= high density lipoprotein; eGFR= estimated glomerular filtration rate; LVH= left ventricular hypertrophy; SBP= systolic blood pressure; DBP= diastolic blood pressure

<sup>a</sup> Adjusted for each covariate shown in that column. Covariates not included in multivariable analysis are indicated with dashes.

<sup>b</sup> First randomization date in the full Morbidity cohort.

Conversion factors: 1 mL/min/1.73m<sup>2</sup> = 0.0167 mL/s/m<sup>2</sup>; 1 mg/dl = 0.0259 mmol/L; 1 mmHg = 0.133 kPa

**eTable 4.** Adjusted<sup>a</sup> Hazard Ratios for Non-CVD Mortality With Follow-up From 2/23/1994<sup>b</sup> to 12/31/2017

|                                                                      | All Non-CVD Mortality    |            | Cancer Mortality         |            | Kidney Disease Mortality |            | Mortality Accident/Suicide |            | Other Non-CVD Mortality  |            | Mortality Unknown Cause  |            |
|----------------------------------------------------------------------|--------------------------|------------|--------------------------|------------|--------------------------|------------|----------------------------|------------|--------------------------|------------|--------------------------|------------|
|                                                                      | Adjusted* HR<br>(95% CI) | P<br>value | Adjusted* HR<br>(95% CI) | P<br>value | Adjusted* HR<br>(95% CI) | P<br>value | Adjusted* HR<br>(95% CI)   | P<br>value | Adjusted* HR<br>(95% CI) | P<br>value | Adjusted* HR<br>(95% CI) | P<br>value |
| <b>Randomized group</b>                                              |                          |            |                          |            |                          |            |                            |            |                          |            |                          |            |
| <i>Amlodipine vs. Chlorthalidone</i>                                 | 0.99 (0.95-1.04)         | 0.722      | 0.96 (0.88-1.04)         | 0.334      | 1.00 (0.81-1.23)         | 0.995      | 0.86 (0.67-1.09)           | 0.219      | 1.02 (0.96-1.08)         | 0.590      | 1.01 (0.74-1.38)         | 0.940      |
| <i>Lisinopril vs Chlorthalidone</i>                                  | 1.01 (0.96-1.06)         | 0.651      | 1.05 (0.97-1.14)         | 0.237      | 1.18 (0.97-1.44)         | 0.094      | 1.08 (0.86-1.35)           | 0.522      | 0.97 (0.91-1.03)         | 0.301      | 0.97 (0.70-1.33)         | 0.828      |
| <b>Age group at trial baseline</b>                                   |                          |            |                          |            |                          |            |                            |            |                          |            |                          |            |
| <i>Age &lt;65</i>                                                    | 1.00 (reference)         |            | 1.00 (reference)         |            | 1.00 (reference)         |            | 1.00 (reference)           |            | 1.00 (reference)         |            | 1.00 (reference)         |            |
| <i>Age ≥65</i>                                                       | 2.02 (1.93-2.11)         | <0.001     | 1.73 (1.60-1.87)         | <0.001     | 1.71 (1.42-2.06)         | <0.001     | 1.94 (1.56-2.41)           | <0.001     | 2.25 (2.12-2.38)         | <0.001     | 1.80 (1.33-2.43)         | <0.001     |
| <b>Gender</b>                                                        |                          |            |                          |            |                          |            |                            |            |                          |            |                          |            |
| <i>Male</i>                                                          | 1.00 (reference)         |            | 1.00 (reference)         |            | 1.00 (reference)         |            | 1.00 (reference)           |            | 1.00 (reference)         |            | 1.00 (reference)         |            |
| <i>Female</i>                                                        | 0.78 (0.74-0.81)         | <0.001     | 0.67 (0.62-0.72)         | <0.001     | 0.69 (0.58-0.84)         | <0.001     | 0.49 (0.39-0.62)           | <0.001     | 0.88 (0.83-0.93)         | <0.001     | 1.03 (0.77-1.38)         | 0.830      |
| <b>Race/Ethnicity</b>                                                |                          |            |                          |            |                          |            |                            |            |                          |            |                          |            |
| <i>Non-Black</i>                                                     | 1.00 (reference)         |            | 1.00 (reference)         |            | 1.00 (reference)         |            | 1.00 (reference)           |            | 1.00 (reference)         |            | 1.00 (reference)         |            |
| <i>Black</i>                                                         | 0.94 (0.90-0.99)         | 0.013      | 1.08 (1.00-1.17)         | 0.040      | 1.32 (1.09-1.60)         | 0.004      | 0.73 (0.58-0.93)           | 0.010      | 0.85 (0.80-0.91)         | <0.001     | 1.76 (1.32-2.34)         | <0.001     |
| <b>Hispanic/Latino Ethnicity</b>                                     |                          |            |                          |            |                          |            |                            |            |                          |            |                          |            |
| <i>Non-Hispanic</i>                                                  | 1.00 (reference)         |            | 1.00 (reference)         |            | 1.00 (reference)         |            | 1.00 (reference)           |            | 1.00 (reference)         |            | 1.00 (reference)         |            |
| <i>Hispanic</i>                                                      | 0.82 (0.78-0.87)         | <0.001     | 0.62 (0.56-0.70)         | <0.001     | 1.11 (0.88-1.40)         | 0.362      | 0.58 (0.43-0.80)           | <0.001     | 0.93 (0.87-1.00)         | 0.050      | 1.03 (0.70-1.52)         | 0.863      |
| <b>Education level at trial baseline</b>                             |                          |            |                          |            |                          |            |                            |            |                          |            |                          |            |
| <i>More than high school</i>                                         | 1.00 (reference)         |            | 1.00 (reference)         |            | 1.00 (reference)         |            | 1.00 (reference)           |            | 1.00 (reference)         |            | 1.00 (reference)         |            |
| <i>High school or less</i>                                           | 1.20 (1.15-1.26)         | <0.001     | 1.27 (1.18-1.38)         | <0.001     | 1.43 (1.16-1.75)         | <0.001     | 1.22 (0.98-1.52)           | 0.073      | 1.14 (1.07-1.21)         | <0.001     | 0.91 (0.68-1.22)         | 0.535      |
| <b>Treatment with antihypertensive drugs prior to trial baseline</b> |                          |            |                          |            |                          |            |                            |            |                          |            |                          |            |
| <i>Untreated</i>                                                     | 1.00 (reference)         |            | 1.00 (reference)         |            | 1.00 (reference)         |            | 1.00 (reference)           |            | 1.00 (reference)         |            | 1.00 (reference)         |            |
| <i>Treated</i>                                                       | 1.10 (1.02-1.18)         | 0.011      | 1.02 (0.90-1.15)         | 0.740      | 1.30 (0.95-1.78)         | 0.106      | 0.92 (0.64-1.31)           | 0.632      | 1.14 (1.04-1.26)         | 0.007      | 1.27 (0.77-2.11)         | 0.346      |
| <b>Aspirin use at trial baseline</b>                                 |                          |            |                          |            |                          |            |                            |            |                          |            |                          |            |
| <i>No</i>                                                            | 1.00 (reference)         |            | 1.00 (reference)         |            | 1.00 (reference)         |            | 1.00 (reference)           |            | 1.00 (reference)         |            | 1.00 (reference)         |            |
| <i>Yes</i>                                                           | 0.97 (0.92-1.01)         | 0.124      | 0.93 (0.86-1.00)         | 0.057      | 0.85 (0.70-1.04)         | 0.111      | 1.11 (0.89-1.37)           | 0.362      | 0.99 (0.93-1.05)         | 0.681      | 1.05 (0.79-1.41)         | 0.718      |
| <b>GFR &lt;60 mL/min/1.73 m<sup>2</sup> at trial baseline</b>        |                          |            |                          |            |                          |            |                            |            |                          |            |                          |            |
| <i>No</i>                                                            | 1.00 (reference)         |            | 1.00 (reference)         |            | 1.00 (reference)         |            | 1.00 (reference)           |            | 1.00 (reference)         |            | 1.00 (reference)         |            |
| <i>Yes</i>                                                           | 1.44 (1.37-1.51)         | <0.001     | 1.22 (1.11-1.34)         | <0.001     | 3.85 (3.20-4.62)         | <0.001     | 1.15 (0.88-1.50)           | 0.313      | 1.43 (1.34-1.53)         | <0.001     | 1.82 (1.35-2.47)         | <0.001     |
| <b>HDL cholesterol &lt;35 mg/dl at trial baseline</b>                |                          |            |                          |            |                          |            |                            |            |                          |            |                          |            |
| <i>No</i>                                                            | 1.00 (reference)         |            | 1.00 (reference)         |            | 1.00 (reference)         |            | 1.00 (reference)           |            | 1.00 (reference)         |            | 1.00 (reference)         |            |
| <i>Yes</i>                                                           | 0.90 (0.85-0.96)         | 0.001      | 1.04 (0.94-1.15)         | 0.460      | 0.91 (0.69-1.20)         | 0.498      | 0.68 (0.49-0.95)           | 0.022      | 0.84 (0.78-0.92)         | <0.001     | 1.21 (0.81-1.80)         | 0.352      |
| <b>Cigarette smoking at trial baseline</b>                           |                          |            |                          |            |                          |            |                            |            |                          |            |                          |            |

|                                                                          | All Non-CVD Mortality    |            | Cancer Mortality         |            | Kidney Disease Mortality |            | Mortality Accident/Suicide |            | Other Non-CVD Mortality  |            | Mortality Unknown Cause  |            |
|--------------------------------------------------------------------------|--------------------------|------------|--------------------------|------------|--------------------------|------------|----------------------------|------------|--------------------------|------------|--------------------------|------------|
|                                                                          | Adjusted* HR<br>(95% CI) | P<br>value | Adjusted* HR<br>(95% CI) | P<br>value | Adjusted* HR<br>(95% CI) | P<br>value | Adjusted* HR<br>(95% CI)   | P<br>value | Adjusted* HR<br>(95% CI) | P<br>value | Adjusted* HR<br>(95% CI) | P<br>value |
| <i>Never smoker</i>                                                      | 1.00 (reference)         |            | 1.00 (reference)         |            | 1.00 (reference)         |            | 1.00 (reference)           |            | 1.00 (reference)         |            | 1.00 (reference)         |            |
| <i>Current smoker</i>                                                    | 1.91 (1.81-2.02)         | <0.001     | 2.59 (2.35-2.86)         | <0.001     | 2.01 (1.58-2.56)         | <0.001     | 1.36 (1.03-1.78)           | 0.030      | 1.62 (1.50-1.75)         | <0.001     | 1.91 (1.32-2.76)         | <0.001     |
| <i>Former Smoker</i>                                                     | 1.14 (1.09-1.20)         | <0.001     | 1.33 (1.22-1.45)         | <0.001     | 1.25 (1.02-1.53)         | 0.034      | 0.77 (0.61-0.97)           | 0.030      | 1.09 (1.03-1.16)         | 0.004      | 1.30 (0.94-1.80)         | 0.109      |
| <b>Diabetes classification at trial baseline</b>                         |                          |            |                          |            |                          |            |                            |            |                          |            |                          |            |
| <i>Non-diabetes</i>                                                      | 1.00 (reference)         |            | 1.00 (reference)         |            | 1.00 (reference)         |            | 1.00 (reference)           |            | 1.00 (reference)         |            | 1.00 (reference)         |            |
| <i>Diabetes</i>                                                          | 1.52 (1.45-1.58)         | <0.001     | 1.10 (1.02-1.19)         | 0.014      | 2.43 (2.02-2.92)         | <0.001     | 1.35 (1.09-1.68)           | 0.007      | 1.75 (1.65-1.85)         | <0.001     | 1.74 (1.32-2.31)         | <0.001     |
| <b>History of Coronary Heart Disease (CHD) at trial baseline</b>         |                          |            |                          |            |                          |            |                            |            |                          |            |                          |            |
| <i>No</i>                                                                | 1.00 (reference)         |            | 1.00 (reference)         |            | 1.00 (reference)         |            | 1.00 (reference)           |            | 1.00 (reference)         |            | 1.00 (reference)         |            |
| <i>Yes</i>                                                               | 0.94 (0.88-1.00)         | 0.050      | 0.99 (0.89-1.10)         | 0.829      | 0.96 (0.73-1.26)         | 0.753      | 0.88 (0.65-1.19)           | 0.396      | 0.91 (0.84-0.99)         | 0.033      | 1.12 (0.76-1.66)         | 0.566      |
| <b>Atherosclerotic Cardiovascular Disease (ASCVD) at trial baseline</b>  |                          |            |                          |            |                          |            |                            |            |                          |            |                          |            |
| <i>No</i>                                                                | 1.00 (reference)         |            | 1.00 (reference)         |            | 1.00 (reference)         |            | 1.00 (reference)           |            | 1.00 (reference)         |            | 1.00 (reference)         |            |
| <i>Yes</i>                                                               | 1.07 (1.00-1.16)         | 0.066      | 0.95 (0.83-1.08)         | 0.403      | 1.01 (0.73-1.39)         | 0.976      | 1.60 (1.09-2.34)           | 0.017      | 1.14 (1.03-1.26)         | 0.013      | 0.76 (0.47-1.23)         | 0.265      |
| <b>History of myocardial infarction (MI) or stroke at trial baseline</b> |                          |            |                          |            |                          |            |                            |            |                          |            |                          |            |
| <i>No</i>                                                                | 1.00 (reference)         |            | 1.00 (reference)         |            | 1.00 (reference)         |            | 1.00 (reference)           |            | 1.00 (reference)         |            | 1.00 (reference)         |            |
| <i>Yes</i>                                                               | 1.17 (1.10-1.25)         | <0.001     | 1.15 (1.03-1.29)         | 0.013      | 1.28 (0.97-1.70)         | 0.085      | 0.80 (0.58-1.11)           | 0.186      | 1.20 (1.10-1.31)         | <0.001     | 1.69 (1.12-2.54)         | 0.012      |
| <b>History of coronary artery bypass graft (CABG) at trial baseline</b>  |                          |            |                          |            |                          |            |                            |            |                          |            |                          |            |
| <i>No</i>                                                                | 1.00 (reference)         |            | 1.00 (reference)         |            | 1.00 (reference)         |            | 1.00 (reference)           |            | 1.00 (reference)         |            | 1.00 (reference)         |            |
| <i>Yes</i>                                                               | 1.01 (0.94-1.09)         | 0.755      | 1.03 (0.91-1.16)         | 0.688      | 1.21 (0.88-1.65)         | 0.243      | 0.84 (0.59-1.20)           | 0.344      | 1.00 (0.91-1.10)         | 0.991      | 0.79 (0.50-1.27)         | 0.333      |
| <b>Other ASCVD at trial baseline</b>                                     |                          |            |                          |            |                          |            |                            |            |                          |            |                          |            |
| <i>No</i>                                                                | 1.00 (reference)         |            | 1.00 (reference)         |            | 1.00 (reference)         |            | 1.00 (reference)           |            | 1.00 (reference)         |            | 1.00 (reference)         |            |
| <i>Yes</i>                                                               | 1.13 (1.06-1.21)         | <0.001     | 1.27 (1.14-1.41)         | <0.001     | 1.06 (0.80-1.40)         | 0.680      | 0.90 (0.65-1.24)           | 0.507      | 1.09 (1.00-1.19)         | 0.053      | 1.51 (1.03-2.23)         | 0.036      |
| <b>Major ST segment depression at trial baseline</b>                     |                          |            |                          |            |                          |            |                            |            |                          |            |                          |            |
| <i>No</i>                                                                | 1.00 (reference)         |            | 1.00 (reference)         |            | 1.00 (reference)         |            | 1.00 (reference)           |            | 1.00 (reference)         |            | 1.00 (reference)         |            |
| <i>Yes</i>                                                               | 0.97 (0.90-1.05)         | 0.445      | 1.06 (0.93-1.21)         | 0.412      | 1.29 (0.94-1.76)         | 0.114      | 0.76 (0.51-1.14)           | 0.182      | 0.91 (0.82-1.02)         | 0.095      | 1.67 (1.09-2.56)         | 0.020      |
| <b>LVH by Minnesota code at trial baseline</b>                           |                          |            |                          |            |                          |            |                            |            |                          |            |                          |            |
| <i>No/Soft LVH</i>                                                       | 1.00 (reference)         |            | 1.00 (reference)         |            | 1.00 (reference)         |            | 1.00 (reference)           |            | 1.00 (reference)         |            | 1.00 (reference)         |            |
| <i>Hard LVH</i>                                                          | 1.12 (1.02-1.23)         | 0.016      | 0.98 (0.83-1.16)         | 0.793      | 1.19 (0.84-1.70)         | 0.327      | 1.20 (0.75-1.92)           | 0.441      | 1.20 (1.06-1.35)         | 0.004      | 1.16 (0.69-1.95)         | 0.572      |
| <b>Lipid Lowering Trial (LLT) Participant</b>                            |                          |            |                          |            |                          |            |                            |            |                          |            |                          |            |
| <i>No</i>                                                                | 1.00 (reference)         |            | 1.00 (reference)         |            | 1.00 (reference)         |            | 1.00 (reference)           |            | 1.00 (reference)         |            | 1.00 (reference)         |            |
| <i>Yes</i>                                                               | 0.91 (0.87-0.95)         | <0.001     | 0.95 (0.87-1.02)         | 0.166      | 0.93 (0.76-1.13)         | 0.461      | 0.97 (0.77-1.21)           | 0.771      | 0.88 (0.83-0.94)         | <0.001     | 0.71 (0.51-1.00)         | 0.047      |
| <b>Obesity (BMI ≥ 30 kg/m<sup>2</sup>) at trial baseline</b>             |                          |            |                          |            |                          |            |                            |            |                          |            |                          |            |
| <i>No</i>                                                                | 1.00 (reference)         |            | 1.00 (reference)         |            | 1.00 (reference)         |            | 1.00 (reference)           |            | 1.00 (reference)         |            | 1.00 (reference)         |            |
| <i>Yes</i>                                                               | 0.94 (0.91-0.98)         | 0.006      | 0.93 (0.87-1.00)         | 0.049      | 1.08 (0.91-1.29)         | 0.358      | 0.88 (0.72-1.08)           | 0.225      | 0.95 (0.90-1.00)         | 0.043      | 0.83 (0.63-1.10)         | 0.188      |
| <b>Baseline blood pressure reading, per 10 mmHg</b>                      |                          |            |                          |            |                          |            |                            |            |                          |            |                          |            |
| <i>Systolic BP</i>                                                       | 1.09 (1.07-1.11)         | <0.001     | 1.04 (1.01-1.07)         | 0.008      | 1.26 (1.17-1.36)         | <0.001     | 0.96 (0.88-1.05)           | 0.349      | 1.12 (1.09-1.15)         | <0.001     | 1.09 (0.97-1.22)         | 0.156      |

|                     | All Non-CVD Mortality    |            | Cancer Mortality         |            | Kidney Disease Mortality |            | Mortality Accident/Suicide |            | Other Non-CVD Mortality  |            | Mortality Unknown Cause  |            |
|---------------------|--------------------------|------------|--------------------------|------------|--------------------------|------------|----------------------------|------------|--------------------------|------------|--------------------------|------------|
|                     | Adjusted* HR<br>(95% CI) | P<br>value | Adjusted* HR<br>(95% CI) | P<br>value | Adjusted* HR<br>(95% CI) | P<br>value | Adjusted* HR<br>(95% CI)   | P<br>value | Adjusted* HR<br>(95% CI) | P<br>value | Adjusted* HR<br>(95% CI) | P<br>value |
| <i>Diastolic BP</i> | 0.86 (0.84-0.89)         | <0.001     | 0.88 (0.84-0.92)         | <0.001     | 0.89 (0.80-0.99)         | 0.029      | 0.84 (0.74-0.96)           | 0.008      | 0.86 (0.83-0.89)         | <0.001     | 1.06 (0.89-1.25)         | 0.520      |

HR= Hazard ratio; 95% CI= 95% Confidence interval; CHD= coronary heart disease; CVD= cardiovascular disease; ASCVD= Atherosclerotic Cardiovascular Disease; OASCVD= Other ASCVD; HDL= high density lipoprotein; eGFR= estimated glomerular filtration rate; LVH= left ventricular hypertrophy; SBP= systolic blood pressure; DBP= diastolic blood pressure

<sup>a</sup> Adjusted for each covariate shown in that column. Covariates not included in multivariable analysis are indicated with dashes.

<sup>b</sup> First randomization date in the Mortality cohort.

Conversion factors: 1 mL/min/1.73m<sup>2</sup> = 0.0167 mL/s/m<sup>2</sup>; 1 mg/dl = 0.0259 mmol/L; 1 mmHg = 0.133 kPa

**eTable 5.** Hazard Ratios Adjusted<sup>a</sup> by Variables Selected Through Penalized Regression for All-Cause and CVD Mortality With Follow-up From 2/23/1994<sup>b</sup> to 12/31/2017<sup>c</sup>

|                                                                      | All-Cause Mortality        |            | CVD Mortality           |            | CHD Mortality           |            | Stroke Mortality        |              | CHF Mortality           |            | Other CVD Mortality        |            |
|----------------------------------------------------------------------|----------------------------|------------|-------------------------|------------|-------------------------|------------|-------------------------|--------------|-------------------------|------------|----------------------------|------------|
|                                                                      | Adjusted HR<br>(95% CI)    | P<br>value | Adjusted HR<br>(95% CI) | P<br>value | Adjusted HR<br>(95% CI) | P<br>value | Adjusted HR<br>(95% CI) | P<br>value   | Adjusted HR<br>(95% CI) | P<br>value | Adjusted HR<br>(95% CI)    | P<br>value |
| <b>Randomized group</b>                                              |                            |            |                         |            |                         |            |                         |              |                         |            |                            |            |
| <i>Amlodipine vs. Chlorthalidone</i>                                 | 1.00 (0.96-1.03)           | 0.827      | 0.96 (0.88-1.05)        | 0.388      | 1.01 (0.94-1.10)        | 0.763      | 1.00 (0.86-1.16)        | 0.968        | 1.00 (0.84-1.19)        | 0.990      | 1.01 (0.91-1.11)           | 0.914      |
| <i>Lisinopril vs Chlorthalidone</i>                                  | 1.00 (0.97-1.04)           | 0.785      | 1.06 (0.98-1.16)        | 0.151      | 0.97 (0.90-1.05)        | 0.493      | <b>1.19 (1.03-1.37)</b> | <b>0.017</b> | 1.02 (0.86-1.21)        | 0.830      | 0.95 (0.86-1.05)           | 0.331      |
| <b>Age group at trial baseline</b>                                   |                            |            |                         |            |                         |            |                         |              |                         |            |                            |            |
| <i>Age &lt;65</i>                                                    | 1.00 (reference)           |            | 1.00 (reference)        |            | 1.00 (reference)        |            | 1.00 (reference)        |              | 1.00 (reference)        |            | 1.00 (reference)           |            |
| <i>Age ≥65</i>                                                       | 2.18 (2.11-2.25)           | <0.001     | 2.35 (2.17-2.55)        | <0.001     | 2.08 (1.93-2.24)        | <0.001     | 2.54 (2.20-2.92)        | <0.001       | 3.05 (2.56-3.63)        | <0.001     | 2.47 (2.24-2.72)           | <0.001     |
| <b>Gender</b>                                                        |                            |            |                         |            |                         |            |                         |              |                         |            |                            |            |
| <i>Male</i>                                                          | 1.00 (reference)           |            | 1.00 (reference)        |            | 1.00 (reference)        |            | 1.00 (reference)        |              | 1.00 (reference)        |            | 1.00 (reference)           |            |
| <i>Female</i>                                                        | 0.79 (0.76-0.82)           | <0.001     | 0.85 (0.78-0.92)        | <0.001     | 0.72 (0.67-0.78)        | <0.001     | 0.90 (0.79-1.03)        | 0.143        | 0.90 (0.77-1.05)        | 0.176      | 0.80 (0.72-0.88)           | <0.001     |
| <b>Race/Ethnicity</b>                                                |                            |            |                         |            |                         |            |                         |              |                         |            |                            |            |
| <i>Non-Black</i>                                                     | 1.00 (reference)           |            | 1.00 (reference)        |            | 1.00 (reference)        |            | 1.00 (reference)        |              | -----                   | -----      | 1.00 (reference)           |            |
| <i>Black</i>                                                         | 0.97 (0.94-1.00)           | 0.062      | 0.93 (0.86-1.01)        | 0.081      | 0.93 (0.86-1.01)        | 0.080      | 0.93 (0.81-1.08)        | 0.338        | -----                   | -----      | 1.19 (1.08-1.31)           | <0.001     |
| <b>Hispanic/Latino Ethnicity</b>                                     |                            |            |                         |            |                         |            |                         |              |                         |            |                            |            |
| <i>Non-Hispanic</i>                                                  | 1.00 (reference)           |            | 1.00 (reference)        |            | 1.00 (reference)        |            | 1.00 (reference)        |              | 1.00 (reference)        |            | 1.00 (reference)           |            |
| <i>Hispanic</i>                                                      | 0.79 (0.76-0.83)           | <0.001     | 0.85 (0.76-0.94)        | 0.002      | 0.79 (0.71-0.87)        | <0.001     | 0.74 (0.62-0.89)        | 0.001        | 0.70 (0.56-0.88)        | 0.002      | 0.69 (0.60-0.79)           | <0.001     |
| <b>Education level at trial baseline</b>                             |                            |            |                         |            |                         |            |                         |              |                         |            |                            |            |
| <i>More than high school</i>                                         | 1.00 (reference)           |            | 1.00 (reference)        |            | 1.00 (reference)        |            | 1.00 (reference)        |              | 1.00 (reference)        |            | 1.00 (reference)           |            |
| <i>High school or less</i>                                           | 1.19 (1.15-1.23)           | <0.001     | 1.21 (1.11-1.31)        | <0.001     | 1.24 (1.15-1.34)        | <0.001     | 1.12 (0.97-1.29)        | 0.111        | 1.16 (0.98-1.36)        | 0.083      | 1.05 (0.96-1.16)           | 0.302      |
| <b>Treatment with antihypertensive drugs prior to trial baseline</b> |                            |            |                         |            |                         |            |                         |              |                         |            |                            |            |
| <i>Untreated</i>                                                     | -----                      | -----      | 1.00 (reference)        |            | 1.00 (reference)        |            | 1.00 (reference)        |              | -----                   | -----      | 1.00 (reference)           |            |
| <i>Treated</i>                                                       | -----                      | -----      | 1.02 (0.90-1.16)        | 0.731      | 0.97 (0.86-1.09)        | 0.587      | 1.20 (0.95-1.51)        | 0.126        | -----                   | -----      | 0.96 (0.82-1.11)           | 0.552      |
| <b>Aspirin use at trial baseline</b>                                 |                            |            |                         |            |                         |            |                         |              |                         |            |                            |            |
| <i>No</i>                                                            | -----                      | -----      | 1.00 (reference)        |            | -----                   | -----      | 1.00 (reference)        |              | -----                   | -----      | 1.00 (reference)           |            |
| <i>Yes</i>                                                           | -----                      | -----      | 1.06 (0.98-1.14)        | 0.159      | -----                   | -----      | 1.14 (0.99-1.30)        | 0.061        | -----                   | -----      | 1.08 (0.98-1.18)           | 0.125      |
| <b>GFR &lt;60 mL/min/1.73 m<sup>2</sup> at trial baseline</b>        |                            |            |                         |            |                         |            |                         |              |                         |            |                            |            |
| <i>No</i>                                                            | 1.00 (reference)           |            | 1.00 (reference)        |            | 1.00 (reference)        |            | 1.00 (reference)        |              | 1.00 (reference)        |            | 1.00 (reference)           |            |
| <i>Yes</i>                                                           | 1.50 (1.44-1.55)           | <0.001     | 1.59 (1.46-1.73)        | <0.001     | 1.48 (1.37-1.61)        | <0.001     | 1.60 (1.38-1.85)        | <0.001       | 1.71 (1.44-2.03)        | <0.001     | 1.62 (1.46-1.81)           | <0.001     |
| <b>HDL cholesterol &lt;35 mg/dl at trial baseline</b>                |                            |            |                         |            |                         |            |                         |              |                         |            |                            |            |
| <i>No</i>                                                            | 1.00 (reference)           |            | 1.00 (reference)        |            | 1.00 (reference)        |            | 1.00 (reference)        |              | 1.00 (reference)        |            | 1.00 (reference)           |            |
| <i>Yes</i>                                                           | 0.89 (0.84-0.93)           | <0.001     | 0.84 (0.75-0.94)        | 0.002      | 0.97 (0.88-1.07)        | 0.582      | 0.69 (0.55-0.85)        | <0.001       | 0.79 (0.62-1.00)        | 0.049      | 0.82 (0.71-0.94)           | 0.006      |
|                                                                      | <b>All-Cause Mortality</b> |            | <b>CVD Mortality</b>    |            | <b>CHD Mortality</b>    |            | <b>Stroke Mortality</b> |              | <b>CHF Mortality</b>    |            | <b>Other CVD Mortality</b> |            |

|                                                                          | Adjusted HR<br>(95% CI)    | P<br>value | Adjusted HR<br>(95% CI) | P<br>value | Adjusted HR<br>(95% CI) | P<br>value | Adjusted HR<br>(95% CI) | P<br>value | Adjusted HR<br>(95% CI) | P<br>value | Adjusted HR<br>(95% CI)    | P<br>value |
|--------------------------------------------------------------------------|----------------------------|------------|-------------------------|------------|-------------------------|------------|-------------------------|------------|-------------------------|------------|----------------------------|------------|
| <b>Cigarette smoking at trial baseline</b>                               |                            |            |                         |            |                         |            |                         |            |                         |            |                            |            |
| <i>Never smoker</i>                                                      | 1.00 (reference)           |            | 1.00 (reference)        |            | 1.00 (reference)        |            | 1.00 (reference)        |            | -----                   | -----      | 1.00 (reference)           |            |
| <i>Current smoker</i>                                                    | 1.68 (1.61-1.75)           | <0.001     | 1.29 (1.17-1.44)        | <0.001     | 1.46 (1.32-1.61)        | <0.001     | 1.11 (0.92-1.33)        | 0.261      | -----                   | -----      | 1.46 (1.29-1.65)           | <0.001     |
| <i>Former Smoker</i>                                                     | 1.11 (1.07-1.15)           | <0.001     | 1.05 (0.96-1.14)        | 0.299      | 1.12 (1.04-1.21)        | 0.004      | 0.95 (0.83-1.10)        | 0.517      | -----                   | -----      | 1.07 (0.96-1.18)           | 0.219      |
| <b>Diabetes classification at trial baseline</b>                         |                            |            |                         |            |                         |            |                         |            |                         |            |                            |            |
| <i>Non-diabetes</i>                                                      | 1.00 (reference)           |            | 1.00 (reference)        |            | 1.00 (reference)        |            | 1.00 (reference)        |            | 1.00 (reference)        |            | 1.00 (reference)           |            |
| <i>Diabetes</i>                                                          | 1.54 (1.49-1.59)           | <0.001     | 1.65 (1.53-1.78)        | <0.001     | 1.70 (1.59-1.82)        | <0.001     | 1.48 (1.29-1.68)        | <0.001     | 1.64 (1.41-1.91)        | <0.001     | 1.29 (1.18-1.42)           | <0.001     |
| <b>History of Coronary Heart Disease (CHD) at trial baseline</b>         |                            |            |                         |            |                         |            |                         |            |                         |            |                            |            |
| <i>No</i>                                                                | -----                      | -----      | -----                   | -----      | -----                   | -----      | -----                   | -----      | -----                   | -----      | -----                      | -----      |
| <i>Yes</i>                                                               | -----                      | -----      | -----                   | -----      | -----                   | -----      | -----                   | -----      | -----                   | -----      | -----                      | -----      |
| <b>Atherosclerotic Cardiovascular Disease (ASCVD) at trial baseline</b>  |                            |            |                         |            |                         |            |                         |            |                         |            |                            |            |
| <i>No</i>                                                                | -----                      | -----      | -----                   | -----      | -----                   | -----      | -----                   | -----      | -----                   | -----      | -----                      | -----      |
| <i>Yes</i>                                                               | -----                      | -----      | -----                   | -----      | -----                   | -----      | -----                   | -----      | -----                   | -----      | -----                      | -----      |
| <b>History of myocardial infarction (MI) or stroke at trial baseline</b> |                            |            |                         |            |                         |            |                         |            |                         |            |                            |            |
| <i>No</i>                                                                | 1.00 (reference)           |            | 1.00 (reference)        |            | 1.00 (reference)        |            | 1.00 (reference)        |            | 1.00 (reference)        |            | 1.00 (reference)           |            |
| <i>Yes</i>                                                               | 1.31 (1.27-1.36)           | <0.001     | 1.52 (1.41-1.65)        | <0.001     | 1.63 (1.51-1.75)        | <0.001     | 1.47 (1.28-1.70)        | <0.001     | 1.26 (1.06-1.49)        | 0.008      | 1.33 (1.20-1.47)           | <0.001     |
| <b>History of coronary artery bypass graft (CABG) at trial baseline</b>  |                            |            |                         |            |                         |            |                         |            |                         |            |                            |            |
| <i>No</i>                                                                | 1.00 (reference)           |            | 1.00 (reference)        |            | 1.00 (reference)        |            | 1.00 (reference)        |            | 1.00 (reference)        |            | -----                      | -----      |
| <i>Yes</i>                                                               | 1.12 (1.07-1.17)           | <0.001     | 1.21 (1.09-1.34)        | <0.001     | 1.51 (1.39-1.65)        | <0.001     | 0.91 (0.75-1.09)        | 0.303      | 1.39 (1.14-1.70)        | <0.001     | -----                      | -----      |
| <b>Other ASCVD at trial baseline</b>                                     |                            |            |                         |            |                         |            |                         |            |                         |            |                            |            |
| <i>No</i>                                                                | 1.00 (reference)           |            | 1.00 (reference)        |            | 1.00 (reference)        |            | 1.00 (reference)        |            | 1.00 (reference)        |            | 1.00 (reference)           |            |
| <i>Yes</i>                                                               | 1.20 (1.16-1.24)           | <0.001     | 1.24 (1.14-1.34)        | <0.001     | 1.30 (1.20-1.40)        | <0.001     | 1.30 (1.13-1.50)        | <0.001     | 1.10 (0.93-1.32)        | 0.262      | 1.11 (1.00-1.24)           | 0.044      |
| <b>Major ST segment depression at trial baseline</b>                     |                            |            |                         |            |                         |            |                         |            |                         |            |                            |            |
| <i>No</i>                                                                | 1.00 (reference)           |            | 1.00 (reference)        |            | 1.00 (reference)        |            | 1.00 (reference)        |            | -----                   | -----      | 1.00 (reference)           |            |
| <i>Yes</i>                                                               | 1.02 (0.97-1.08)           | 0.345      | 1.05 (0.94-1.18)        | 0.365      | 1.05 (0.94-1.17)        | 0.390      | 0.97 (0.79-1.19)        | 0.775      | -----                   | -----      | 0.98 (0.85-1.13)           | 0.758      |
| <b>LVH by Minnesota code at trial baseline</b>                           |                            |            |                         |            |                         |            |                         |            |                         |            |                            |            |
| <i>No/Soft LVH</i>                                                       | 1.00 (reference)           |            | 1.00 (reference)        |            | 1.00 (reference)        |            | 1.00 (reference)        |            | 1.00 (reference)        |            | 1.00 (reference)           |            |
| <i>Hard LVH</i>                                                          | 1.40 (1.31-1.49)           | <0.001     | 1.75 (1.53-2.01)        | <0.001     | 1.63 (1.42-1.86)        | <0.001     | 1.81 (1.44-2.28)        | <0.001     | 1.96 (1.50-2.55)        | <0.001     | 1.72 (1.46-2.03)           | <0.001     |
| <b>Lipid Lowering Trial (LLT) Participant</b>                            |                            |            |                         |            |                         |            |                         |            |                         |            |                            |            |
| <i>No</i>                                                                | 1.00 (reference)           |            | 1.00 (reference)        |            | 1.00 (reference)        |            | 1.00 (reference)        |            | 1.00 (reference)        |            | -----                      | -----      |
| <i>Yes</i>                                                               | 0.94 (0.91-0.97)           | <0.001     | 0.96 (0.88-1.04)        | 0.301      | 0.97 (0.90-1.05)        | 0.449      | -----                   | -----      | 0.86 (0.72-1.02)        | 0.091      | -----                      | -----      |
| <b>Obesity (BMI ≥ 30 kg/m<sup>2</sup>) at trial baseline</b>             |                            |            |                         |            |                         |            |                         |            |                         |            |                            |            |
| <i>No</i>                                                                | 1.00 (reference)           |            | 1.00 (reference)        |            | 1.00 (reference)        |            | 1.00 (reference)        |            | 1.00 (reference)        |            | 1.00 (reference)           |            |
| <i>Yes</i>                                                               | 0.95 (0.92-0.98)           | 0.001      | 0.98 (0.91-1.05)        | 0.535      | 0.98 (0.92-1.05)        | 0.630      | 0.85 (0.75-0.97)        | 0.015      | 1.14 (0.98-1.32)        | 0.084      | 0.97 (0.88-1.06)           | 0.445      |
| <b>Baseline blood pressure reading, per 10 mmHg</b>                      |                            |            |                         |            |                         |            |                         |            |                         |            |                            |            |
|                                                                          | <b>All-Cause Mortality</b> |            | <b>CVD Mortality</b>    |            | <b>CHD Mortality</b>    |            | <b>Stroke Mortality</b> |            | <b>CHF Mortality</b>    |            | <b>Other CVD Mortality</b> |            |

|                     | Adjusted HR<br>(95% CI) | P<br>value | Adjusted HR<br>(95% CI) | P<br>value | Adjusted HR<br>(95% CI) | P<br>value | Adjusted HR<br>(95% CI) | P<br>value | Adjusted HR<br>(95% CI) | P<br>value | Adjusted HR<br>(95% CI) | P<br>value |
|---------------------|-------------------------|------------|-------------------------|------------|-------------------------|------------|-------------------------|------------|-------------------------|------------|-------------------------|------------|
| <i>Systolic BP</i>  | -----                   | -----      | -----                   | -----      | -----                   | -----      | -----                   | -----      | -----                   | -----      | -----                   | -----      |
| <i>Diastolic BP</i> | 0.94 (0.92-0.96)        | <0.001     | 0.96 (0.92-1.00)        | 0.064      | 0.95 (0.92-0.99)        | 0.013      | 1.07 (0.99-1.15)        | 0.072      | 0.83 (0.77-0.90)        | <0.001     | 1.02 (0.97-1.07)        | 0.514      |

HR= Hazard ratio; 95% CI= 95% Confidence interval; CHD= coronary heart disease; CVD= cardiovascular disease; ASCVD= Atherosclerotic Cardiovascular Disease; OASCVD= Other ASCVD; HDL= high density lipoprotein; eGFR= estimated glomerular filtration rate; LVH= left ventricular hypertrophy; SBP= systolic blood pressure; DBP= diastolic blood pressure

<sup>a</sup> Adjusted for each covariate shown in that column using LASSO penalty for variable selection (no penalty for the randomization group). Covariates not included in multivariable analysis are indicated with dashes.

<sup>b</sup> First randomization date in the Mortality cohort.

<sup>c</sup> Correlation between candidate variables was assessed prior to initiation of Least Absolute Shrinkage and Selection Operator (LASSO) regression procedures; variables that demonstrated moderate to high correlation with each other/other candidate variables were subject to preliminary removal. These included ASCVD, history of CHD, and baseline systolic blood pressure reading.

Conversion factors: 1 mL/min/1.73m<sup>2</sup> = 0.0167 mL/s/m<sup>2</sup>; 1 mg/dl = 0.0259 mmol/L; 1 mmHg = 0.133 kPa

**eTable 6.** Hazard Ratios Adjusted<sup>a</sup> by Variables Selected Through Penalized Regression for Morbidity With Follow-up From 3/10/1994<sup>b</sup> to 12/31/2017<sup>c</sup>

|                                                                      | CVD Morbidity            |            | CHD Morbidity            |            | CHF Morbidity            |            | Stroke Morbidity         |              | Cancer Morbidity         |            | Kidney Disease Morbidity |            |
|----------------------------------------------------------------------|--------------------------|------------|--------------------------|------------|--------------------------|------------|--------------------------|--------------|--------------------------|------------|--------------------------|------------|
|                                                                      | Adjusted* HR<br>(95% CI) | P<br>value | Adjusted* HR<br>(95% CI) | P<br>value | Adjusted* HR<br>(95% CI) | P<br>value | Adjusted* HR<br>(95% CI) | P<br>value   | Adjusted* HR<br>(95% CI) | P<br>value | Adjusted* HR<br>(95% CI) | P<br>value |
| <b>Randomized group</b>                                              |                          |            |                          |            |                          |            |                          |              |                          |            |                          |            |
| <i>Amlodipine vs. Chlorthalidone</i>                                 | 1.01 (0.96-1.06)         | 0.701      | 0.99 (0.92-1.06)         | 0.780      | 1.02 (0.96-1.08)         | 0.495      | 1.03 (0.95-1.12)         | 0.428        | 0.99 (0.92-1.07)         | 0.835      | 1.05 (0.90-1.22)         | 0.536      |
| <i>Lisinopril vs Chlorthalidone</i>                                  | 1.04 (0.99-1.09)         | 0.150      | 0.98 (0.91-1.05)         | 0.520      | 1.03 (0.97-1.09)         | 0.364      | <b>1.11 (1.03-1.20)</b>  | <b>0.007</b> | 1.02 (0.94-1.10)         | 0.626      | 1.13 (0.98-1.31)         | 0.091      |
| <b>Age group at trial baseline</b>                                   |                          |            |                          |            |                          |            |                          |              |                          |            |                          |            |
| <i>Age &lt;65</i>                                                    | 1.00 (reference)         |            | 1.00 (reference)         |            | 1.00 (reference)         |            | 1.00 (reference)         |              | 1.00 (reference)         |            | 1.00 (reference)         |            |
| <i>Age ≥65</i>                                                       | 1.82 (1.74-1.92)         | <0.001     | 1.74 (1.62-1.86)         | <0.001     | 1.92 (1.81-2.03)         | <0.001     | 1.86 (1.72-2.01)         | <0.001       | 1.64 (1.52-1.76)         | <0.001     | 1.10 (0.96-1.26)         | 0.169      |
| <b>Gender</b>                                                        |                          |            |                          |            |                          |            |                          |              |                          |            |                          |            |
| <i>Male</i>                                                          | 1.00 (reference)         |            | 1.00 (reference)         |            | 1.00 (reference)         |            | 1.00 (reference)         |              | 1.00 (reference)         |            | 1.00 (reference)         |            |
| <i>Female</i>                                                        | 0.93 (0.89-0.98)         | 0.004      | 0.82 (0.77-0.88)         | <0.001     | 0.98 (0.93-1.04)         | 0.483      | 0.97 (0.91-1.05)         | 0.499        | 0.69 (0.64-0.74)         | <0.001     | 0.67 (0.58-0.77)         | <0.001     |
| <b>Race/Ethnicity</b>                                                |                          |            |                          |            |                          |            |                          |              |                          |            |                          |            |
| <i>Non-Black</i>                                                     | 1.00 (reference)         |            | 1.00 (reference)         |            | 1.00 (reference)         |            | 1.00 (reference)         |              | 1.00 (reference)         |            | 1.00 (reference)         |            |
| <i>Black</i>                                                         | 0.96 (0.91-1.01)         | 0.110      | 0.89 (0.83-0.96)         | 0.002      | 0.97 (0.92-1.03)         | 0.328      | 1.01 (0.94-1.09)         | 0.766        | 1.06 (0.98-1.14)         | 0.157      | 1.86 (1.63-2.13)         | <0.001     |
| <b>Hispanic/Latino Ethnicity</b>                                     |                          |            |                          |            |                          |            |                          |              |                          |            |                          |            |
| <i>Non-Hispanic</i>                                                  | 1.00 (reference)         |            | 1.00 (reference)         |            | 1.00 (reference)         |            | 1.00 (reference)         |              | 1.00 (reference)         |            | -----                    | -----      |
| <i>Hispanic</i>                                                      | 0.71 (0.67-0.76)         | <0.001     | 0.79 (0.72-0.86)         | <0.001     | 0.62 (0.58-0.67)         | <0.001     | 0.74 (0.67-0.82)         | <0.001       | 0.62 (0.56-0.69)         | <0.001     | -----                    | -----      |
| <b>Education level at trial baseline</b>                             |                          |            |                          |            |                          |            |                          |              |                          |            |                          |            |
| <i>More than high school</i>                                         | 1.00 (reference)         |            | 1.00 (reference)         |            | 1.00 (reference)         |            | 1.00 (reference)         |              | 1.00 (reference)         |            | 1.00 (reference)         |            |
| <i>High school or less</i>                                           | 1.20 (1.14-1.26)         | <0.001     | 1.21 (1.13-1.30)         | <0.001     | 1.20 (1.13-1.27)         | <0.001     | 1.16 (1.07-1.25)         | <0.001       | 1.13 (1.05-1.22)         | 0.002      | 1.09 (0.94-1.26)         | 0.254      |
| <b>Treatment with antihypertensive drugs prior to trial baseline</b> |                          |            |                          |            |                          |            |                          |              |                          |            |                          |            |
| <i>Untreated</i>                                                     | 1.00 (reference)         |            | 1.00 (reference)         |            | 1.00 (reference)         |            | 1.00 (reference)         |              | 1.00 (reference)         |            | -----                    | -----      |
| <i>Treated</i>                                                       | 1.15 (1.07-1.25)         | <0.001     | 0.98 (0.88-1.09)         | 0.727      | 1.11 (1.01-1.22)         | 0.029      | 1.18 (1.05-1.34)         | 0.007        | 1.07 (0.95-1.21)         | 0.246      | -----                    | -----      |
| <b>Aspirin use at trial baseline</b>                                 |                          |            |                          |            |                          |            |                          |              |                          |            |                          |            |
| <i>No</i>                                                            | 1.00 (reference)         |            | 1.00 (reference)         |            | 1.00 (reference)         |            | 1.00 (reference)         |              | 1.00 (reference)         |            | 1.00 (reference)         |            |
| <i>Yes</i>                                                           | 1.06 (1.02-1.12)         | 0.009      | 1.06 (0.99-1.13)         | 0.093      | 1.03 (0.97-1.09)         | 0.312      | 1.15 (1.07-1.23)         | <0.001       | 0.92 (0.85-0.98)         | 0.017      | 0.90 (0.78-1.04)         | 0.165      |
| <b>GFR &lt;60 mL/min/1.73 m<sup>2</sup> at trial baseline</b>        |                          |            |                          |            |                          |            |                          |              |                          |            |                          |            |
| <i>No</i>                                                            | 1.00 (reference)         |            | 1.00 (reference)         |            | 1.00 (reference)         |            | 1.00 (reference)         |              | 1.00 (reference)         |            | 1.00 (reference)         |            |
| <i>Yes</i>                                                           | 1.41 (1.34-1.49)         | <0.001     | 1.42 (1.32-1.53)         | <0.001     | 1.55 (1.46-1.64)         | <0.001     | 1.31 (1.21-1.42)         | <0.001       | 1.19 (1.09-1.29)         | <0.001     | 5.25 (4.62-5.97)         | <0.001     |
| <b>HDL cholesterol &lt;35 mg/dl at trial baseline</b>                |                          |            |                          |            |                          |            |                          |              |                          |            |                          |            |
| <i>No</i>                                                            | 1.00 (reference)         |            | 1.00 (reference)         |            | 1.00 (reference)         |            | 1.00 (reference)         |              | 1.00 (reference)         |            | 1.00 (reference)         |            |
| <i>Yes</i>                                                           | 0.94 (0.87-1.00)         | 0.066      | 1.06 (0.97-1.16)         | 0.217      | 0.92 (0.85-1.00)         | 0.045      | 0.86 (0.77-0.97)         | 0.010        | 1.03 (0.93-1.14)         | 0.599      | 0.96 (0.78-1.19)         | 0.704      |
| <b>Cigarette smoking at trial baseline</b>                           |                          |            |                          |            |                          |            |                          |              |                          |            |                          |            |



|                                                                          | CVD Morbidity            |            | CHD Morbidity            |            | CHF Morbidity            |            | Stroke Morbidity         |            | Cancer Morbidity         |            | Kidney Disease Morbidity |            |
|--------------------------------------------------------------------------|--------------------------|------------|--------------------------|------------|--------------------------|------------|--------------------------|------------|--------------------------|------------|--------------------------|------------|
|                                                                          | Adjusted* HR<br>(95% CI) | P<br>value | Adjusted* HR<br>(95% CI) | P<br>value | Adjusted* HR<br>(95% CI) | P<br>value | Adjusted* HR<br>(95% CI) | P<br>value | Adjusted* HR<br>(95% CI) | P<br>value | Adjusted* HR<br>(95% CI) | P<br>value |
| <i>Never smoker</i>                                                      | 1.00 (reference)         |            | 1.00 (reference)         |            | 1.00 (reference)         |            | 1.00 (reference)         |            | 1.00 (reference)         |            | 1.00 (reference)         |            |
| <i>Current smoker</i>                                                    | 1.40 (1.31-1.49)         | <0.001     | 1.47 (1.34-1.61)         | <0.001     | 1.38 (1.28-1.49)         | <0.001     | 1.41 (1.28-1.55)         | <0.001     | 2.03 (1.86-2.22)         | <0.001     | 1.76 (1.47-2.11)         | <0.001     |
| <i>Former Smoker</i>                                                     | 1.09 (1.04-1.15)         | <0.001     | 1.13 (1.05-1.21)         | <0.001     | 1.08 (1.02-1.15)         | 0.007      | 1.11 (1.03-1.20)         | 0.009      | 1.24 (1.14-1.34)         | <0.001     | 1.23 (1.06-1.42)         | 0.005      |
| <b>Diabetes classification at trial baseline</b>                         |                          |            |                          |            |                          |            |                          |            |                          |            |                          |            |
| <i>Non-diabetes</i>                                                      | 1.00 (reference)         |            | 1.00 (reference)         |            | 1.00 (reference)         |            | 1.00 (reference)         |            | -----                    | -----      | 1.00 (reference)         |            |
| <i>Diabetes</i>                                                          | 1.58 (1.51-1.65)         | <0.001     | 1.70 (1.60-1.82)         | <0.001     | 1.70 (1.61-1.79)         | <0.001     | 1.51 (1.41-1.62)         | <0.001     | -----                    | -----      | 3.17 (2.77-3.63)         | <0.001     |
| <b>History of Coronary Heart Disease (CHD) at trial baseline</b>         |                          |            |                          |            |                          |            |                          |            |                          |            |                          |            |
| <i>No</i>                                                                | -----                    | -----      | -----                    | -----      | -----                    | -----      | -----                    | -----      | -----                    | -----      | -----                    | -----      |
| <i>Yes</i>                                                               | -----                    | -----      | -----                    | -----      | -----                    | -----      | -----                    | -----      | -----                    | -----      | -----                    | -----      |
| <b>Atherosclerotic Cardiovascular Disease (ASCVD) at trial baseline</b>  |                          |            |                          |            |                          |            |                          |            |                          |            |                          |            |
| <i>No</i>                                                                | -----                    | -----      | -----                    | -----      | -----                    | -----      | -----                    | -----      | -----                    | -----      | -----                    | -----      |
| <i>Yes</i>                                                               | -----                    | -----      | -----                    | -----      | -----                    | -----      | -----                    | -----      | -----                    | -----      | -----                    | -----      |
| <b>History of myocardial infarction (MI) or stroke at trial baseline</b> |                          |            |                          |            |                          |            |                          |            |                          |            |                          |            |
| <i>No</i>                                                                | 1.00 (reference)         |            | 1.00 (reference)         |            | 1.00 (reference)         |            | 1.00 (reference)         |            | -----                    | -----      | 1.00 (reference)         |            |
| <i>Yes</i>                                                               | 1.46 (1.39-1.53)         | <0.001     | 1.52 (1.42-1.63)         | <0.001     | 1.45 (1.37-1.54)         | <0.001     | 1.38 (1.28-1.50)         | <0.001     | -----                    | -----      | 1.17 (1.00-1.36)         | 0.051      |
| <b>History of coronary artery bypass graft (CABG) at trial baseline</b>  |                          |            |                          |            |                          |            |                          |            |                          |            |                          |            |
| <i>No</i>                                                                | 1.00 (reference)         |            | 1.00 (reference)         |            | 1.00 (reference)         |            | 1.00 (reference)         |            | -----                    | -----      | 1.00 (reference)         |            |
| <i>Yes</i>                                                               | 1.29 (1.22-1.38)         | <0.001     | 1.53 (1.41-1.66)         | <0.001     | 1.32 (1.23-1.42)         | <0.001     | 1.26 (1.15-1.39)         | <0.001     | -----                    | -----      | 1.27 (1.04-1.55)         | 0.017      |
| <b>Other ASCVD at trial baseline</b>                                     |                          |            |                          |            |                          |            |                          |            |                          |            |                          |            |
| <i>No</i>                                                                | 1.00 (reference)         |            | 1.00 (reference)         |            | 1.00 (reference)         |            | 1.00 (reference)         |            | 1.00 (reference)         |            | 1.00 (reference)         |            |
| <i>Yes</i>                                                               | 1.19 (1.14-1.26)         | <0.001     | 1.23 (1.15-1.32)         | <0.001     | 1.19 (1.12-1.26)         | <0.001     | 1.20 (1.11-1.30)         | <0.001     | 1.13 (1.05-1.22)         | 0.001      | 1.08 (0.92-1.27)         | 0.324      |
| <b>Major ST segment depression at trial baseline</b>                     |                          |            |                          |            |                          |            |                          |            |                          |            |                          |            |
| <i>No</i>                                                                | 1.00 (reference)         |            | 1.00 (reference)         |            | 1.00 (reference)         |            | 1.00 (reference)         |            | -----                    | -----      | 1.00 (reference)         |            |
| <i>Yes</i>                                                               | 1.10 (1.03-1.18)         | 0.006      | 1.01 (0.91-1.11)         | 0.873      | 1.18 (1.09-1.27)         | <0.001     | 1.00 (0.89-1.11)         | 0.938      | -----                    | -----      | 1.20 (0.98-1.46)         | 0.078      |
| <b>LVH by Minnesota code at trial baseline</b>                           |                          |            |                          |            |                          |            |                          |            |                          |            |                          |            |
| <i>No/Soft LVH</i>                                                       | 1.00 (reference)         |            | 1.00 (reference)         |            | 1.00 (reference)         |            | 1.00 (reference)         |            | -----                    | -----      | 1.00 (reference)         |            |
| <i>Hard LVH</i>                                                          | 1.61 (1.48-1.76)         | <0.001     | 1.53 (1.35-1.73)         | <0.001     | 1.81 (1.64-2.00)         | <0.001     | 1.57 (1.37-1.79)         | <0.001     | -----                    | -----      | 1.49 (1.17-1.89)         | 0.001      |
| <b>Lipid Lowering Trial (LLT) Participant</b>                            |                          |            |                          |            |                          |            |                          |            |                          |            |                          |            |
| <i>No</i>                                                                | 1.00 (reference)         |            | 1.00 (reference)         |            | 1.00 (reference)         |            | 1.00 (reference)         |            | 1.00 (reference)         |            | -----                    | -----      |
| <i>Yes</i>                                                               | 0.95 (0.90-0.99)         | 0.025      | 0.93 (0.87-1.00)         | 0.050      | 0.94 (0.88-0.99)         | 0.024      | 0.96 (0.89-1.04)         | 0.293      | 0.93 (0.86-1.00)         | 0.044      | -----                    | -----      |
| <b>Obesity (BMI ≥ 30 kg/m<sup>2</sup>) at trial baseline</b>             |                          |            |                          |            |                          |            |                          |            |                          |            |                          |            |
| <i>No</i>                                                                | 1.00 (reference)         |            | 1.00 (reference)         |            | 1.00 (reference)         |            | 1.00 (reference)         |            | 1.00 (reference)         |            | 1.00 (reference)         |            |
| <i>Yes</i>                                                               | 1.08 (1.04-1.13)         | <0.001     | 0.93 (0.87-0.99)         | 0.028      | 1.24 (1.18-1.30)         | <0.001     | 0.93 (0.87-0.99)         | 0.034      | 1.02 (0.95-1.09)         | 0.609      | 1.15 (1.02-1.31)         | 0.027      |
| <b>Baseline blood pressure reading, per 10 mmHg</b>                      |                          |            |                          |            |                          |            |                          |            |                          |            |                          |            |
| <i>Systolic BP</i>                                                       | -----                    | -----      | -----                    | -----      | -----                    | -----      | -----                    | -----      | -----                    | -----      | -----                    | -----      |

|                     | CVD Morbidity            |            | CHD Morbidity            |            | CHF Morbidity            |            | Stroke Morbidity         |            | Cancer Morbidity         |            | Kidney Disease Morbidity |            |
|---------------------|--------------------------|------------|--------------------------|------------|--------------------------|------------|--------------------------|------------|--------------------------|------------|--------------------------|------------|
|                     | Adjusted* HR<br>(95% CI) | P<br>value | Adjusted* HR<br>(95% CI) | P<br>value | Adjusted* HR<br>(95% CI) | P<br>value | Adjusted* HR<br>(95% CI) | P<br>value | Adjusted* HR<br>(95% CI) | P<br>value | Adjusted* HR<br>(95% CI) | P<br>value |
| <i>Diastolic BP</i> | 0.95 (0.93-0.98)         | <0.001     | 0.98 (0.95-1.02)         | 0.411      | 0.92 (0.90-0.95)         | <0.001     | 1.00 (0.96-1.04)         | 0.834      | 0.92 (0.89-0.96)         | <0.001     | 1.06 (0.98-1.14)         | 0.136      |

HR= Hazard ratio; 95% CI= 95% Confidence interval; CHD= coronary heart disease; CVD= cardiovascular disease; ASCVD= Atherosclerotic Cardiovascular Disease; OASCVD= Other ASCVD; HDL= high density lipoprotein; eGFR= estimated glomerular filtration rate; LVH= left ventricular hypertrophy; SBP= systolic blood pressure; DBP= diastolic blood pressure

<sup>a</sup> Adjusted for each covariate shown in that column using LASSO penalty for variable selection (no penalty for the randomization group). Covariates not included in multivariable analysis are indicated with dashes.

<sup>b</sup> First randomization date in the full Morbidity cohort

<sup>c</sup> Correlation between candidate variables was assessed prior to initiation of Least Absolute Shrinkage and Selection Operator (LASSO) regression procedures; variables that demonstrated moderate to high correlation with each other/other candidate variables were subject to preliminary removal. These included ASCVD, history of CHD, and baseline systolic blood pressure

Conversion factors: 1 mL/min/1.73m<sup>2</sup> = 0.0167 mL/s/m<sup>2</sup>; 1 mg/dl = 0.0259 mmol/L; 1 mmHg = 0.133 kPa

**eTable 7.** Hazard Ratios Adjusted<sup>a</sup> by Variables Selected Through Penalized Regression for Non-CVD Mortality With Follow-up From 2/23/1994<sup>b</sup> to 12/31/2017<sup>†</sup>

|                                                                      | All Non-CVD Mortality        |            | Cancer Mortality        |            | Kidney Disease Mortality        |            | Mortality Accident/Suicide        |            | Other Non-CVD Mortality        |            | Mortality Unknown Cause        |            |
|----------------------------------------------------------------------|------------------------------|------------|-------------------------|------------|---------------------------------|------------|-----------------------------------|------------|--------------------------------|------------|--------------------------------|------------|
|                                                                      | Adjusted HR<br>(95% CI)      | P<br>value | Adjusted HR<br>(95% CI) | P<br>value | Adjusted HR<br>(95% CI)         | P<br>value | Adjusted HR<br>(95% CI)           | P<br>value | Adjusted HR<br>(95% CI)        | P<br>value | Adjusted HR<br>(95% CI)        | P<br>value |
| <b>Randomized group</b>                                              |                              |            |                         |            |                                 |            |                                   |            |                                |            |                                |            |
| <i>Amlodipine vs. Chlorthalidone</i>                                 | 0.99 (0.94-1.04)             | 0.617      | 0.97 (0.90-1.05)        | 0.490      | 1.00 (0.82-1.24)                | 0.966      | 0.85 (0.67-1.08)                  | 0.187      | 1.01 (0.95-1.08)               | 0.650      | 0.97 (0.72-1.31)               | 0.845      |
| <i>Lisinopril vs Chlorthalidone</i>                                  | 1.01 (0.96-1.06)             | 0.681      | 1.06 (0.98-1.14)        | 0.154      | 1.18 (0.97-1.44)                | 0.094      | 1.08 (0.86-1.35)                  | 0.518      | 0.97 (0.91-1.03)               | 0.292      | 0.95 (0.70-1.29)               | 0.762      |
| <b>Age group at trial baseline</b>                                   |                              |            |                         |            |                                 |            |                                   |            |                                |            |                                |            |
| <i>Age &lt;65</i>                                                    | 1.00 (reference)             |            | 1.00 (reference)        |            | 1.00 (reference)                |            | 1.00 (reference)                  |            | 1.00 (reference)               |            | 1.00 (reference)               |            |
| <i>Age ≥65</i>                                                       | 2.09 (2.00-2.18)             | <0.001     | 1.73 (1.61-1.85)        | <0.001     | 1.84 (1.53-2.21)                | <0.001     | 1.92 (1.55-2.37)                  | <0.001     | 2.35 (2.22-2.49)               | <0.001     | 1.87 (1.40-2.49)               | <0.001     |
| <b>Gender</b>                                                        |                              |            |                         |            |                                 |            |                                   |            |                                |            |                                |            |
| <i>Male</i>                                                          | 1.00 (reference)             |            | 1.00 (reference)        |            | 1.00 (reference)                |            | 1.00 (reference)                  |            | 1.00 (reference)               |            | -----                          | -----      |
| <i>Female</i>                                                        | 0.79 (0.76-0.82)             | <0.001     | 0.68 (0.63-0.73)        | <0.001     | 0.73 (0.61-0.88)                | <0.001     | 0.49 (0.39-0.61)                  | <0.001     | 0.90 (0.85-0.95)               | <0.001     | -----                          | -----      |
| <b>Race/Ethnicity</b>                                                |                              |            |                         |            |                                 |            |                                   |            |                                |            |                                |            |
| <i>Non-Black</i>                                                     | 1.00 (reference)             |            | 1.00 (reference)        |            | 1.00 (reference)                |            | 1.00 (reference)                  |            | 1.00 (reference)               |            | 1.00 (reference)               |            |
| <i>Black</i>                                                         | 0.93 (0.89-0.97)             | 0.002      | 1.07 (1.00-1.15)        | 0.051      | 1.26 (1.05-1.51)                | 0.013      | 0.75 (0.60-0.95)                  | 0.016      | 0.84 (0.79-0.89)               | <0.001     | 1.65 (1.27-2.15)               | <0.001     |
| <b>Hispanic/Latino Ethnicity</b>                                     |                              |            |                         |            |                                 |            |                                   |            |                                |            |                                |            |
| <i>Non-Hispanic</i>                                                  | 1.00 (reference)             |            | 1.00 (reference)        |            | -----                           | -----      | 1.00 (reference)                  |            | 1.00 (reference)               |            | -----                          | -----      |
| <i>Hispanic</i>                                                      | 0.82 (0.77-0.86)             | <0.001     | 0.64 (0.58-0.70)        | <0.001     | -----                           | -----      | 0.61 (0.45-0.83)                  | 0.002      | 0.93 (0.87-1.00)               | 0.046      | -----                          | -----      |
| <b>Education level at trial baseline</b>                             |                              |            |                         |            |                                 |            |                                   |            |                                |            |                                |            |
| <i>More than high school</i>                                         | 1.00 (reference)             |            | 1.00 (reference)        |            | 1.00 (reference)                |            | 1.00 (reference)                  |            | 1.00 (reference)               |            | -----                          | -----      |
| <i>High school or less</i>                                           | 1.21 (1.16-1.27)             | <0.001     | 1.26 (1.17-1.36)        | <0.001     | 1.48 (1.21-1.81)                | <0.001     | 1.22 (0.98-1.51)                  | 0.074      | 1.15 (1.09-1.22)               | <0.001     | -----                          | -----      |
| <b>Treatment with antihypertensive drugs prior to trial baseline</b> |                              |            |                         |            |                                 |            |                                   |            |                                |            |                                |            |
| <i>Untreated</i>                                                     | -----                        | -----      | 1.00 (reference)        |            | -----                           | -----      | -----                             | -----      | -----                          | -----      | -----                          | -----      |
| <i>Treated</i>                                                       | -----                        | -----      | 0.97 (0.87-1.09)        | 0.651      | -----                           | -----      | -----                             | -----      | -----                          | -----      | -----                          | -----      |
| <b>Aspirin use at trial baseline</b>                                 |                              |            |                         |            |                                 |            |                                   |            |                                |            |                                |            |
| <i>No</i>                                                            | 1.00 (reference)             |            | 1.00 (reference)        |            | 1.00 (reference)                |            | 1.00 (reference)                  |            | -----                          | -----      | -----                          | -----      |
| <i>Yes</i>                                                           | 0.97 (0.93-1.01)             | 0.181      | 0.90 (0.84-0.97)        | 0.006      | 0.86 (0.71-1.04)                | 0.113      | 1.12 (0.92-1.38)                  | 0.255      | -----                          | -----      | -----                          | -----      |
| <b>GFR &lt;60 mL/min/1.73 m<sup>2</sup> at trial baseline</b>        |                              |            |                         |            |                                 |            |                                   |            |                                |            |                                |            |
| <i>No</i>                                                            | 1.00 (reference)             |            | 1.00 (reference)        |            | 1.00 (reference)                |            | 1.00 (reference)                  |            | 1.00 (reference)               |            | 1.00 (reference)               |            |
| <i>Yes</i>                                                           | 1.44 (1.36-1.51)             | <0.001     | 1.21 (1.10-1.32)        | <0.001     | 3.83 (3.19-4.59)                | <0.001     | 1.13 (0.87-1.48)                  | 0.352      | 1.43 (1.34-1.53)               | <0.001     | 1.86 (1.40-2.48)               | <0.001     |
| <b>HDL cholesterol &lt;35 mg/dl at trial baseline</b>                |                              |            |                         |            |                                 |            |                                   |            |                                |            |                                |            |
| <i>No</i>                                                            | 1.00 (reference)             |            | 1.00 (reference)        |            | 1.00 (reference)                |            | 1.00 (reference)                  |            | 1.00 (reference)               |            | -----                          | -----      |
| <i>Yes</i>                                                           | 0.89 (0.83-0.94)             | <0.001     | 1.05 (0.95-1.16)        | 0.343      | 0.87 (0.66-1.15)                | 0.329      | 0.73 (0.54-0.99)                  | 0.046      | 0.82 (0.76-0.89)               | <0.001     | -----                          | -----      |
|                                                                      | <b>All Non-CVD Mortality</b> |            | <b>Cancer Mortality</b> |            | <b>Kidney Disease Mortality</b> |            | <b>Mortality Accident/Suicide</b> |            | <b>Other Non-CVD Mortality</b> |            | <b>Mortality Unknown Cause</b> |            |

|                                                                          | Adjusted HR<br>(95% CI) | P<br>value | Adjusted HR<br>(95% CI) | P<br>value | Adjusted HR<br>(95% CI)  | P<br>value | Adjusted HR<br>(95% CI)    | P<br>value | Adjusted HR<br>(95% CI) | P<br>value | Adjusted HR<br>(95% CI) | P<br>value |
|--------------------------------------------------------------------------|-------------------------|------------|-------------------------|------------|--------------------------|------------|----------------------------|------------|-------------------------|------------|-------------------------|------------|
| <b>Cigarette smoking at trial baseline</b>                               |                         |            |                         |            |                          |            |                            |            |                         |            |                         |            |
| <i>Never smoker</i>                                                      | 1.00 (reference)        |            | 1.00 (reference)        |            | 1.00 (reference)         |            | 1.00 (reference)           |            | 1.00 (reference)        |            | 1.00 (reference)        |            |
| <i>Current smoker</i>                                                    | 1.90 (1.80-2.01)        | <0.001     | 2.58 (2.36-2.82)        | <0.001     | 1.99 (1.57-2.53)         | <0.001     | 1.27 (0.97-1.66)           | 0.082      | 1.59 (1.48-1.72)        | <0.001     | 1.87 (1.33-2.63)        | <0.001     |
| <i>Former Smoker</i>                                                     | 1.15 (1.09-1.20)        | <0.001     | 1.32 (1.22-1.44)        | <0.001     | 1.25 (1.02-1.53)         | 0.033      | 0.75 (0.60-0.95)           | 0.015      | 1.09 (1.03-1.16)        | 0.004      | 1.26 (0.94-1.68)        | 0.126      |
| <b>Diabetes classification at trial baseline</b>                         |                         |            |                         |            |                          |            |                            |            |                         |            |                         |            |
| <i>Non-diabetes</i>                                                      | 1.00 (reference)        |            | 1.00 (reference)        |            | 1.00 (reference)         |            | 1.00 (reference)           |            | 1.00 (reference)        |            | 1.00 (reference)        |            |
| <i>Diabetes</i>                                                          | 1.53 (1.47-1.60)        | <0.001     | 1.12 (1.05-1.20)        | 0.001      | 2.52 (2.12-3.00)         | <0.001     | 1.25 (1.01-1.53)           | 0.037      | 1.77 (1.67-1.87)        | <0.001     | 1.77 (1.36-2.30)        | <0.001     |
| <b>History of Coronary Heart Disease (CHD) at trial baseline</b>         |                         |            |                         |            |                          |            |                            |            |                         |            |                         |            |
| <i>No</i>                                                                | -----                   | -----      | -----                   | -----      | -----                    | -----      | -----                      | -----      | -----                   | -----      | -----                   | -----      |
| <i>Yes</i>                                                               | -----                   | -----      | -----                   | -----      | -----                    | -----      | -----                      | -----      | -----                   | -----      | -----                   | -----      |
| <b>Atherosclerotic Cardiovascular Disease (ASCVD) at trial baseline</b>  |                         |            |                         |            |                          |            |                            |            |                         |            |                         |            |
| <i>No</i>                                                                | -----                   | -----      | -----                   | -----      | -----                    | -----      | -----                      | -----      | -----                   | -----      | -----                   | -----      |
| <i>Yes</i>                                                               | -----                   | -----      | -----                   | -----      | -----                    | -----      | -----                      | -----      | -----                   | -----      | -----                   | -----      |
| <b>History of myocardial infarction (MI) or stroke at trial baseline</b> |                         |            |                         |            |                          |            |                            |            |                         |            |                         |            |
| <i>No</i>                                                                | 1.00 (reference)        |            | 1.00 (reference)        |            | 1.00 (reference)         |            | -----                      | -----      | 1.00 (reference)        |            | 1.00 (reference)        |            |
| <i>Yes</i>                                                               | 1.18 (1.13-1.24)        | <0.001     | 1.15 (1.06-1.24)        | <0.001     | 1.27 (1.03-1.57)         | 0.024      | -----                      | -----      | 1.24 (1.16-1.32)        | <0.001     | 1.54 (1.16-2.04)        | 0.002      |
| <b>History of coronary artery bypass graft (CABG) at trial baseline</b>  |                         |            |                         |            |                          |            |                            |            |                         |            |                         |            |
| <i>No</i>                                                                | 1.00 (reference)        |            | 1.00 (reference)        |            | 1.00 (reference)         |            | -----                      | -----      | 1.00 (reference)        |            | 1.00 (reference)        |            |
| <i>Yes</i>                                                               | 1.00 (0.94-1.07)        | 0.922      | 1.00 (0.90-1.11)        | 0.989      | 1.18 (0.90-1.55)         | 0.224      | -----                      | -----      | 1.00 (0.92-1.08)        | 0.967      | 0.80 (0.54-1.20)        | 0.284      |
| <b>Other ASCVD at trial baseline</b>                                     |                         |            |                         |            |                          |            |                            |            |                         |            |                         |            |
| <i>No</i>                                                                | 1.00 (reference)        |            | 1.00 (reference)        |            | -----                    | -----      | 1.00 (reference)           |            | 1.00 (reference)        |            | 1.00 (reference)        |            |
| <i>Yes</i>                                                               | 1.17 (1.12-1.23)        | <0.001     | 1.20 (1.11-1.30)        | <0.001     | -----                    | -----      | 1.12 (0.89-1.42)           | 0.342      | 1.16 (1.09-1.23)        | <0.001     | 1.31 (0.98-1.76)        | 0.072      |
| <b>Major ST segment depression at trial baseline</b>                     |                         |            |                         |            |                          |            |                            |            |                         |            |                         |            |
| <i>No</i>                                                                | 1.00 (reference)        |            | 1.00 (reference)        |            | 1.00 (reference)         |            | -----                      | -----      | 1.00 (reference)        |            | 1.00 (reference)        |            |
| <i>Yes</i>                                                               | 1.01 (0.95-1.08)        | 0.680      | 1.02 (0.92-1.14)        | 0.673      | 1.32 (1.01-1.71)         | 0.039      | -----                      | -----      | 0.99 (0.90-1.08)        | 0.763      | 1.46 (1.01-2.10)        | 0.042      |
| <b>LVH by Minnesota code at trial baseline</b>                           |                         |            |                         |            |                          |            |                            |            |                         |            |                         |            |
| <i>No/Soft LVH</i>                                                       | 1.00 (reference)        |            | -----                   | -----      | 1.00 (reference)         |            | 1.00 (reference)           |            | 1.00 (reference)        |            | 1.00 (reference)        |            |
| <i>Hard LVH</i>                                                          | 1.16 (1.06-1.28)        | 0.001      | -----                   | -----      | 1.29 (0.90-1.83)         | 0.162      | 1.12 (0.71-1.79)           | 0.622      | 1.25 (1.11-1.42)        | <0.001     | 1.16 (0.70-1.92)        | 0.555      |
| <b>Lipid Lowering Trial (LLT) Participant</b>                            |                         |            |                         |            |                          |            |                            |            |                         |            |                         |            |
| <i>No</i>                                                                | 1.00 (reference)        |            | 1.00 (reference)        |            | 1.00 (reference)         |            | -----                      | -----      | 1.00 (reference)        |            | 1.00 (reference)        |            |
| <i>Yes</i>                                                               | 0.91 (0.87-0.95)        | <0.001     | 0.95 (0.88-1.02)        | 0.162      | 0.93 (0.77-1.13)         | 0.478      | -----                      | -----      | 0.89 (0.84-0.94)        | <0.001     | 0.68 (0.49-0.94)        | 0.018      |
| <b>Obesity (BMI ≥ 30 kg/m<sup>2</sup>) at trial baseline</b>             |                         |            |                         |            |                          |            |                            |            |                         |            |                         |            |
| <i>No</i>                                                                | 1.00 (reference)        |            | 1.00 (reference)        |            | -----                    | -----      | 1.00 (reference)           |            | 1.00 (reference)        |            | 1.00 (reference)        |            |
| <i>Yes</i>                                                               | 0.94 (0.90-0.98)        | 0.002      | 0.91 (0.85-0.97)        | 0.005      | -----                    | -----      | 0.89 (0.73-1.09)           | 0.262      | 0.94 (0.89-0.99)        | 0.023      | 0.83 (0.64-1.08)        | 0.158      |
| <b>Baseline blood pressure reading, per 10 mmHg</b>                      |                         |            |                         |            |                          |            |                            |            |                         |            |                         |            |
|                                                                          | All Non-CVD Mortality   |            | Cancer Mortality        |            | Kidney Disease Mortality |            | Mortality Accident/Suicide |            | Other Non-CVD Mortality |            | Mortality Unknown Cause |            |

|                     | Adjusted HR<br>(95% CI) | P<br>value | Adjusted HR<br>(95% CI) | P<br>value | Adjusted HR<br>(95% CI) | P<br>value | Adjusted HR<br>(95% CI) | P<br>value | Adjusted HR<br>(95% CI) | P<br>value | Adjusted HR<br>(95% CI) | P<br>value |
|---------------------|-------------------------|------------|-------------------------|------------|-------------------------|------------|-------------------------|------------|-------------------------|------------|-------------------------|------------|
| <i>Systolic BP</i>  | -----                   | -----      | -----                   | -----      | -----                   | -----      | -----                   | -----      | -----                   | -----      | -----                   | -----      |
| <i>Diastolic BP</i> | 0.91 (0.89-0.93)        | <0.001     | 0.90 (0.87-0.94)        | <0.001     | -----                   | -----      | 0.82 (0.74-0.92)        | <0.001     | 0.92 (0.89-0.94)        | <0.001     | 1.04 (0.91-1.20)        | 0.557      |

HR= Hazard ratio; 95% CI= 95% Confidence interval; CHD= coronary heart disease; CVD= cardiovascular disease; ASCVD= Atherosclerotic Cardiovascular Disease; OASCVD= Other ASCVD; HDL= high density lipoprotein; eGFR= estimated glomerular filtration rate; LVH= left ventricular hypertrophy; SBP= systolic blood pressure; DBP= diastolic blood pressure

†Correlation between candidate variables was assessed prior to initiation of Least Absolute Shrinkage and Selection Operator (LASSO) regression procedures; variables that demonstrated moderate to high correlation with each other/other candidate variables were subject to preliminary removal. These included ASCVD, history of CHD, and baseline systolic blood pressure reading.

<sup>a</sup> Adjusted for each covariate shown in that column using LASSO penalty for variable selection (no penalty for the randomization group). Covariates not included in multivariable analysis are indicated with dashes.

<sup>b</sup> First randomization date in the Mortality cohort

Conversion factors: 1 mL/min/1.73m<sup>2</sup> = 0.0167 mL/s/m<sup>2</sup>; 1 mg/dl = 0.0259 mmol/L; 1 mmHg = 0.133 kPa

**eFigure 1A.** Kaplan-Meier Plots of Primary and Secondary Outcomes Through the Extended Follow-up (by 12/31/2017)

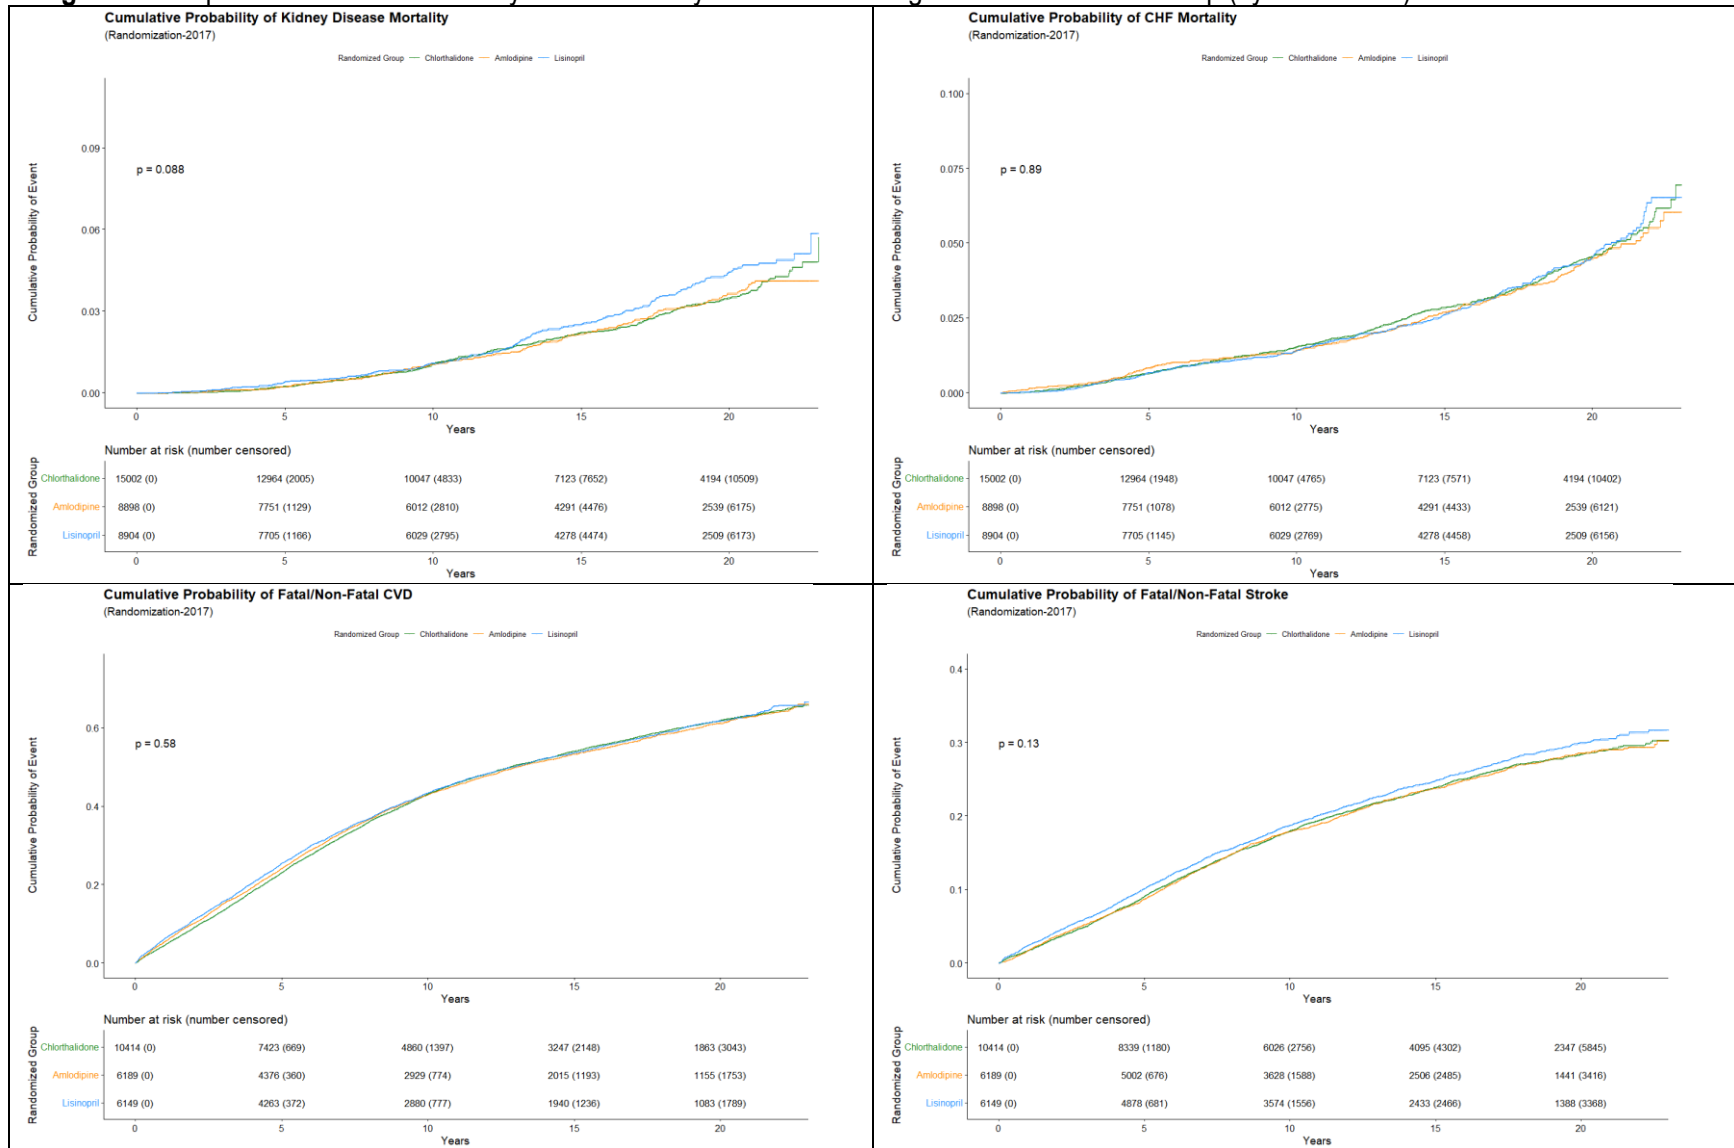

**eFigure 1B.** Kaplan-Meier Plots of Primary and Secondary Outcomes Through the Extended Follow-up (by 12/31/2017)

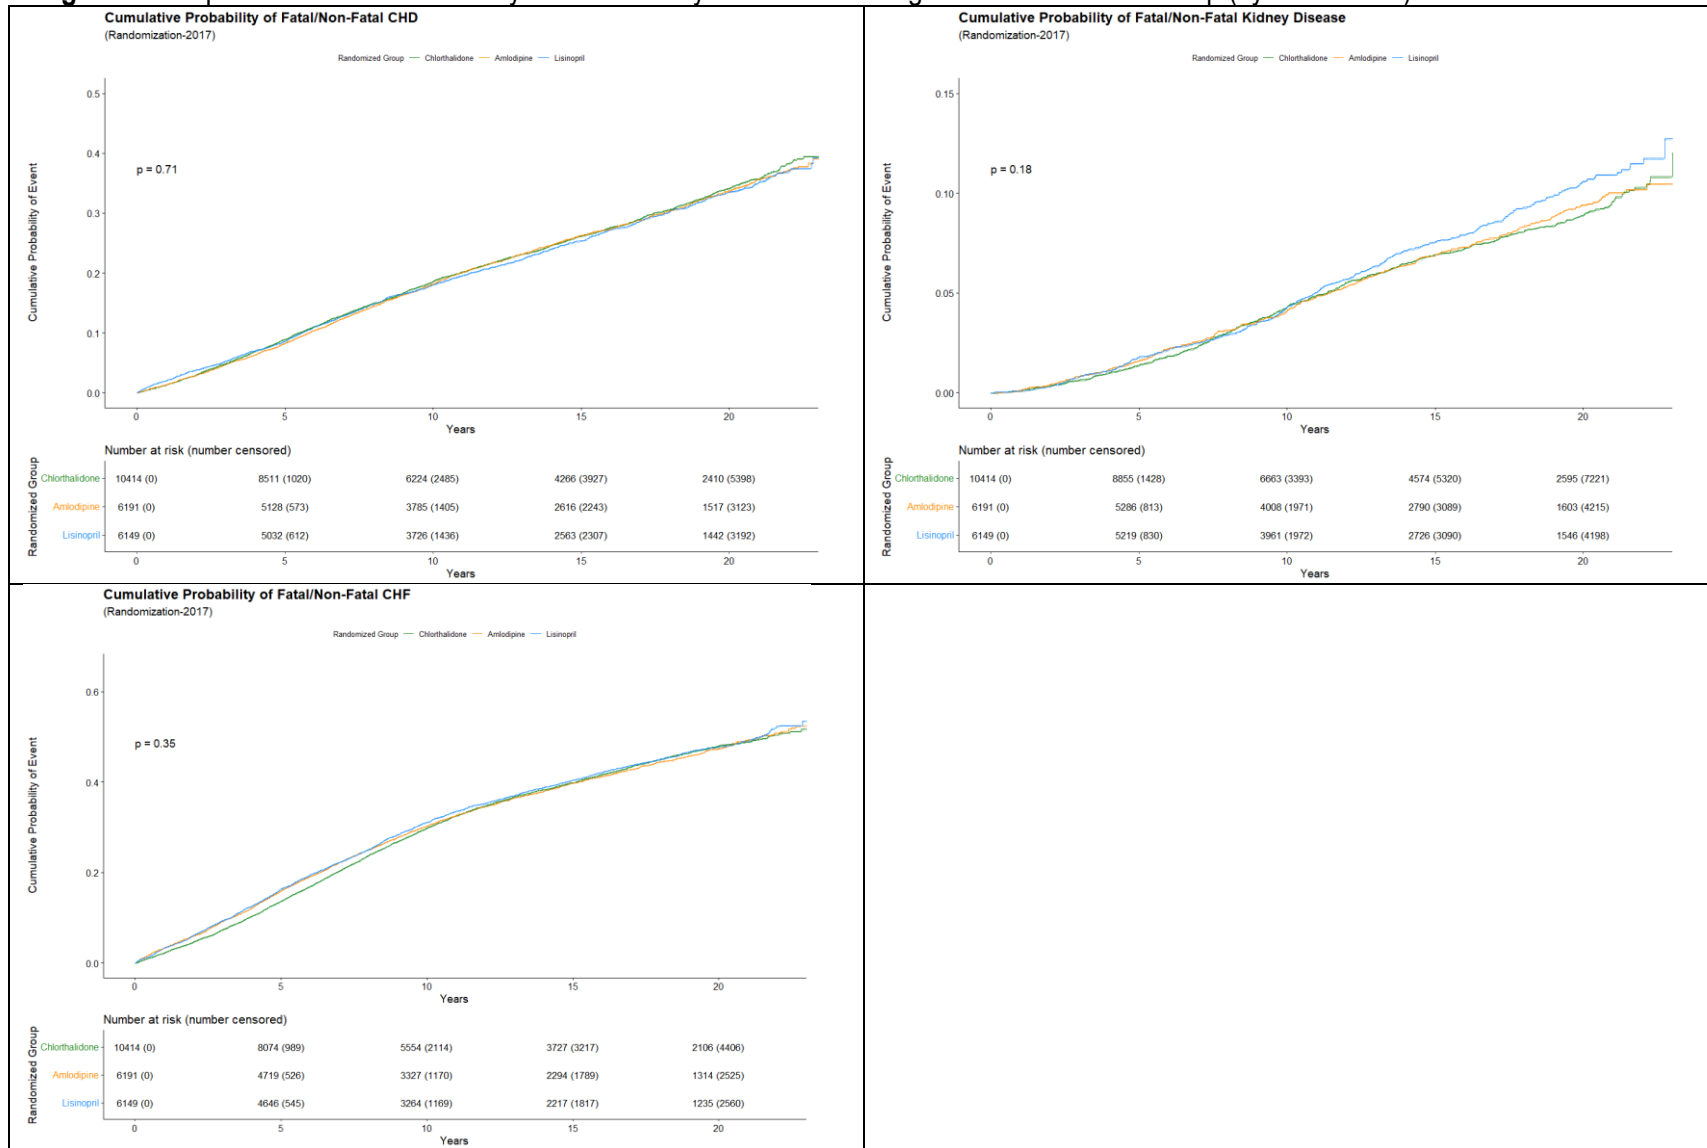

**eFigure 2A.** Unadjusted Hazard Ratios (95% CI) and Forest Plots of Overall and Subgroup Analyses of Mortality and Morbidity Outcomes Through the Extended Follow-up (by 12/31/2017) – Amlodipine vs. Chlorthalidone and Lisinopril vs. Chlorthalidone<sup>a</sup>

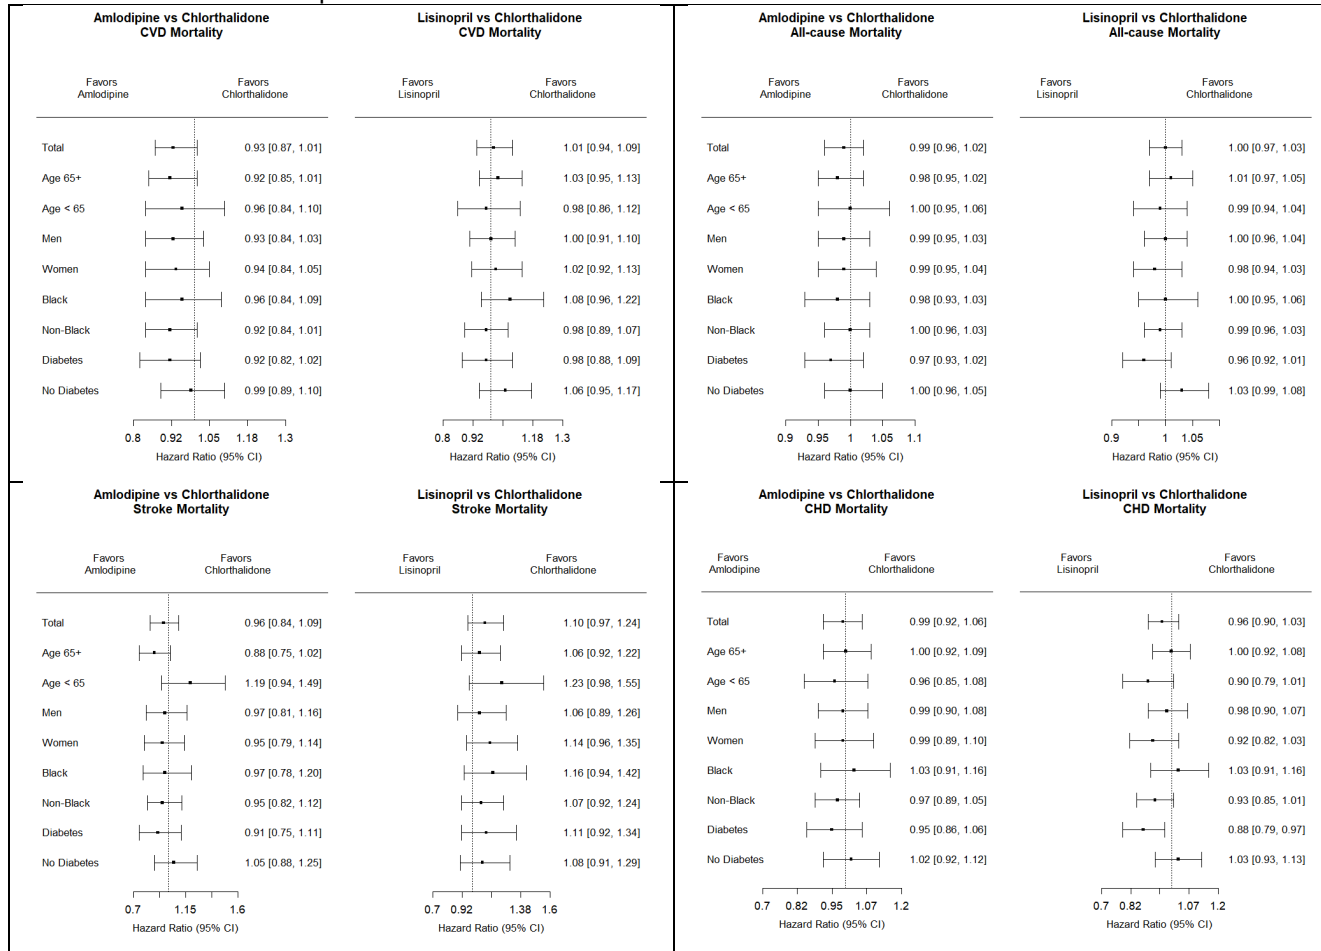

<sup>a</sup> Significant interactions were detected between lisinopril/chlorthalidone × diabetes status for all-cause mortality (p=0.024) and for CHD mortality (p=0.027). Significant interaction was detected for amlodipine/chlorthalidone × age 65+ for stroke mortality (p=0.033).



**eFigure 2B.** Unadjusted Hazard Ratios (95% CI) and Forest Plots of Overall and Subgroup Analyses of Mortality and Morbidity Outcomes Through the Extended Follow-up (by 12/31/2017) – Amlodipine vs. Chlorthalidone and Lisinopril vs. Chlorthalidone<sup>a</sup>

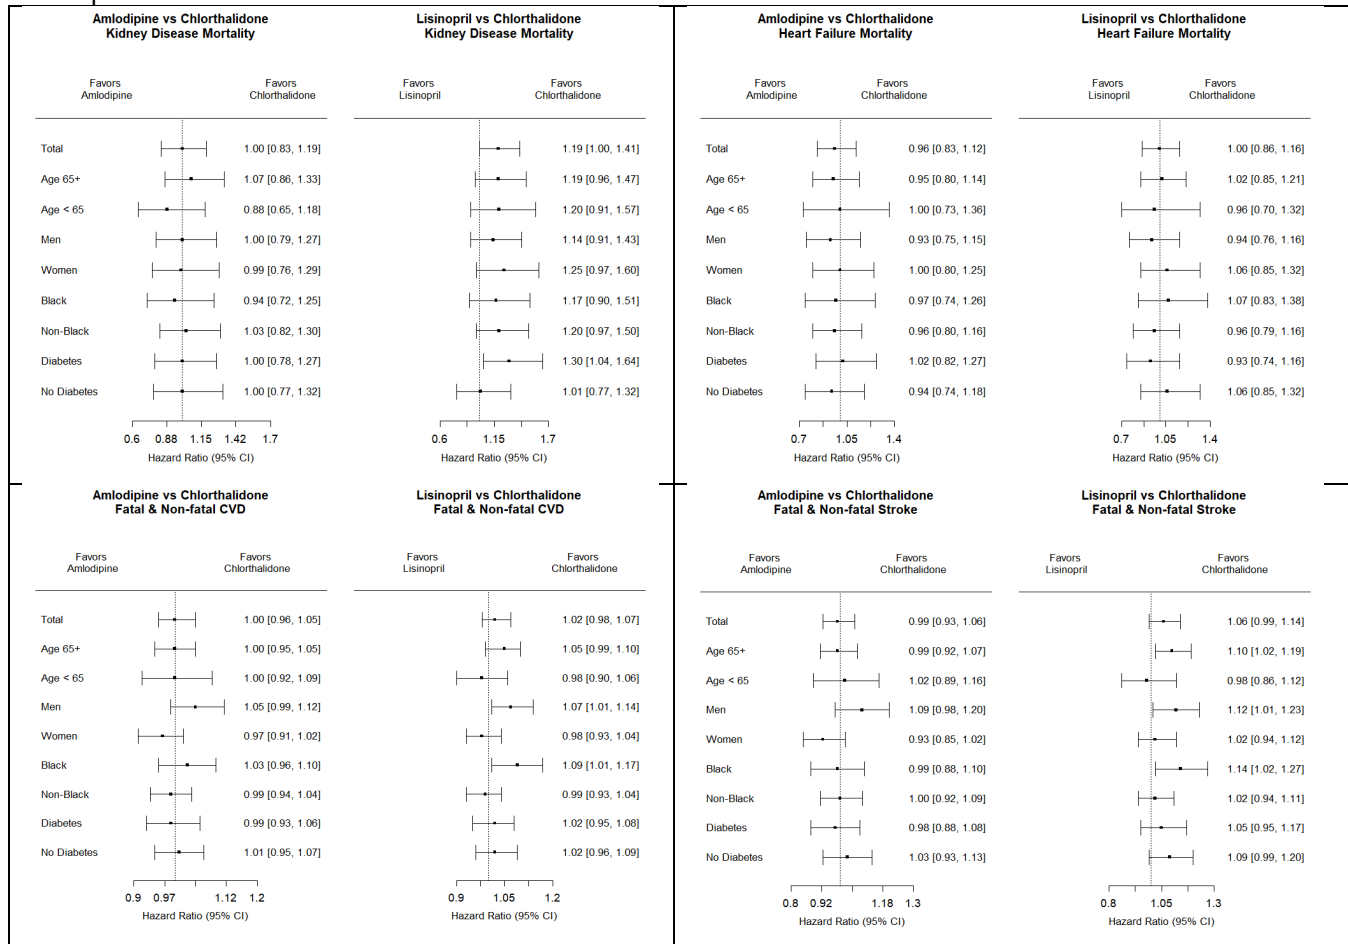

<sup>a</sup> Significant interactions were detected between Lisinopril/Chlorthalidone × female/male for fatal and non-fatal CVD (p=0.043), between Lisinopril/Chlorthalidone × Black/non-Black for fatal and nonfatal CVD (p=0.031), and between amlodipine/chlorthalidone × male/female for fatal and non-fatal stroke (p=0.027).

**eFigure 2C.** Unadjusted Hazard Ratios (95% CI) and Forest Plots of Overall and Subgroup Analyses of Mortality and Morbidity Outcomes Through the Extended Follow-up (by 12/31/2017) – Amlodipine vs. Chlorthalidone and Lisinopril vs. Chlorthalidone<sup>a</sup>

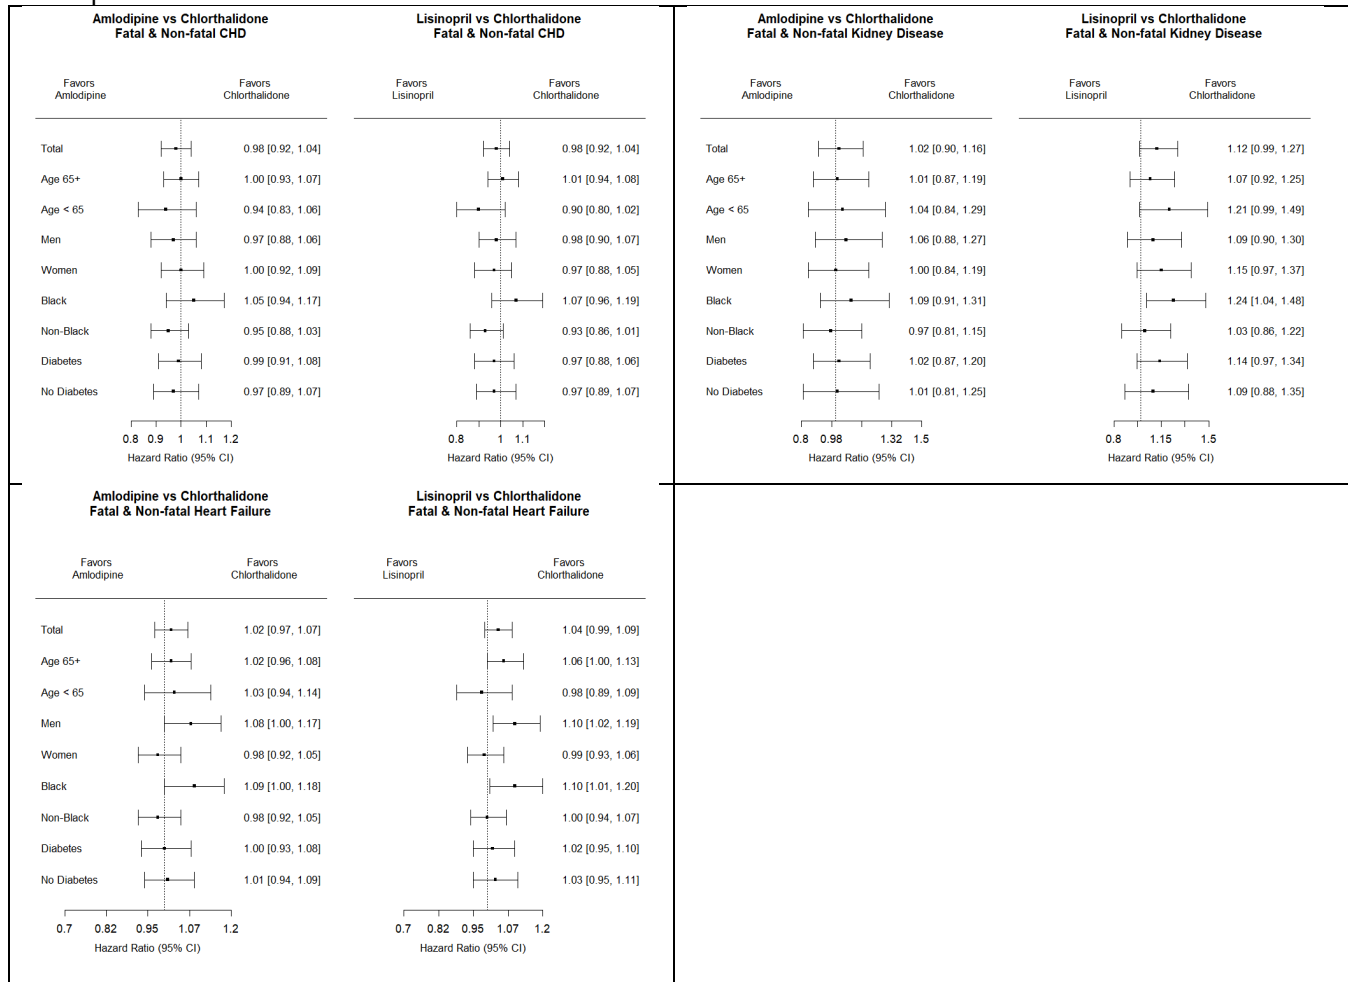

<sup>a</sup> Significant interactions were detected between Lisinopril/Chlorthalidone × Black/non-Black for fatal and non-fatal CHD (p=0.042) and between Lisinopril/Chlorthalidone × female/male for fatal and non-fatal heart failure (p=0.046).
