# Supplementary material for: Mortality and Morbidity Among Individuals With Hypertension Receiving a Diuretic, ACE Inhibitor, or Calcium Channel Blocker: A Secondary Analysis of a Randomized Clinical Trial
Source: PubMed Central journal article supplement (PMC10696481; doi:10.1001/jamanetworkopen.2023.44998), 2023-12-04
Supplement: jamanetwopen-e2344998-s003.pdf [file jamanetwopen-e2344998-s003.pdf]

## Data Sharing Statement

Yamal. Mortality and Morbidity Among Individuals With Hypertension Receiving a Diuretic, ACE Inhibitor, or Calcium Channel Blocker. *JAMA Netw Open*. Published December 04, 2023. doi:10.1001/jamanetworkopen.2023.44998

### Data

**Data available:** No

### Additional Information

**Explanation for why data not available:** Limited dataset is available at <https://biolincc.nhlbi.nih.gov/studies/allhat/>
